# Supplementary material for: Silver mediated duplex-type complexes of pyrimidinophanes and their acyclic counterparts
Source: Royal Society of Chemistry journal article supplement (doi:10.1039/c4ra14070b), 2015-01-01
Supplement: c4ra14070b1.pdf [file c4ra14070b1.pdf]

## Electronic Supplementary Information

### Silver mediated duplex-type complexes of pyrimidinophanes and their acyclic counterparts

Sergey N. Podyachev,<sup>\*a</sup> Alexey N. Masliy,<sup>b</sup> Vyacheslav E. Semenov,<sup>a</sup> Victor V. Syakaev,<sup>a</sup>  
Svetlana N. Sudakova,<sup>a</sup> Julia K. Voronina,<sup>a</sup> Vladimir T. Ivanov,<sup>a</sup> Andrey M. Kuznetsov,<sup>b</sup>  
Edward L. Gogolashvili,<sup>a</sup> Vladimir S. Reznik<sup>a</sup>, Alexander I. Konovalov<sup>a</sup>

<sup>a</sup> *A. E. Arbuzov Institute of Organic and Physical Chemistry, Kazan Scientific Center of Russian  
Academy of Sciences, Arbuzov str., 8, 420088, Kazan, Russia*

<sup>b</sup> *Kazan National Research State Technological University, K. Marks str., 68, 420015, Kazan,  
Russia*

\* Corresponding author. Fax: +07 843 2731872; e-mail: spodyachev@iopc.ru

|                                                                                                                      |     |
|----------------------------------------------------------------------------------------------------------------------|-----|
| Contents                                                                                                             | S1  |
| The structural formulae of the investigated compounds <b>L1-L5</b>                                                   | S2  |
| The optimized structures of compound <b>L1</b> , its complexes and coordinates for<br>geometry-optimized structures  | S3  |
| The optimized structures of compound <b>L3</b> , its complexes and coordinates for<br>geometry-optimized structures  | S7  |
| The optimized structures of compound <b>L4</b> , its complexes and coordinates for<br>geometry-optimized structures  | S21 |
| The optimized structures of compound <b>L5a</b> , its complexes and coordinates for<br>geometry-optimized structures | S31 |
| Enthalpy and entropy of formation for complex isomers $[Ag_nL_m]^{n+}$                                               | S46 |

## The structural formulae of the investigated compounds L1-L5

### Pyrimidine units

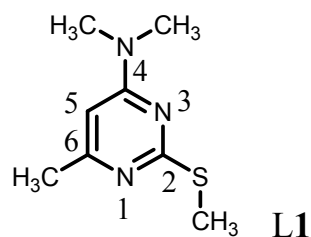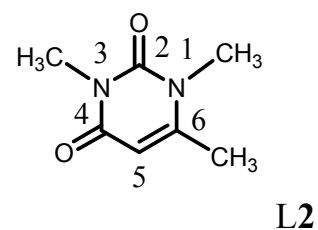

### Podands

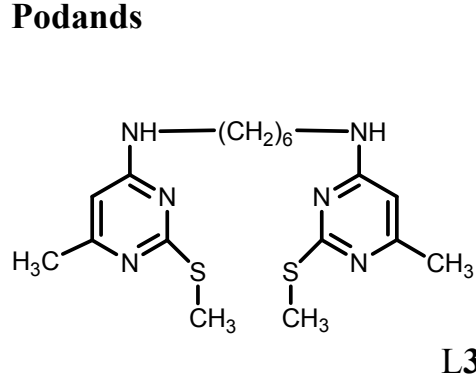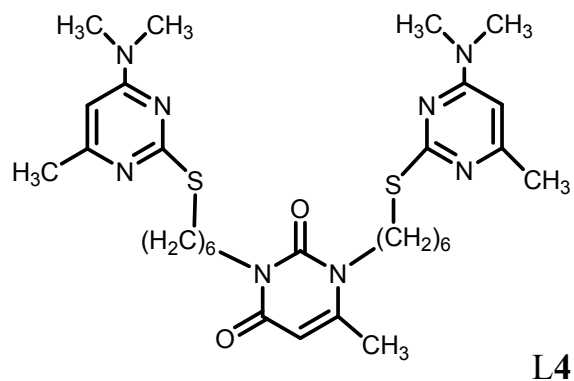

### Pyrimidinophanes

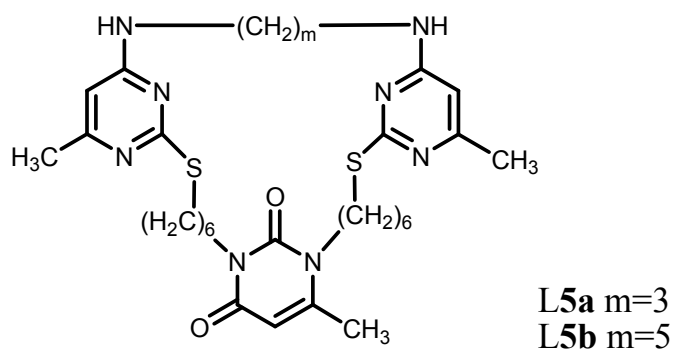

The optimized structures of compound L1, its complexes and coordinates for geometry-optimized structures

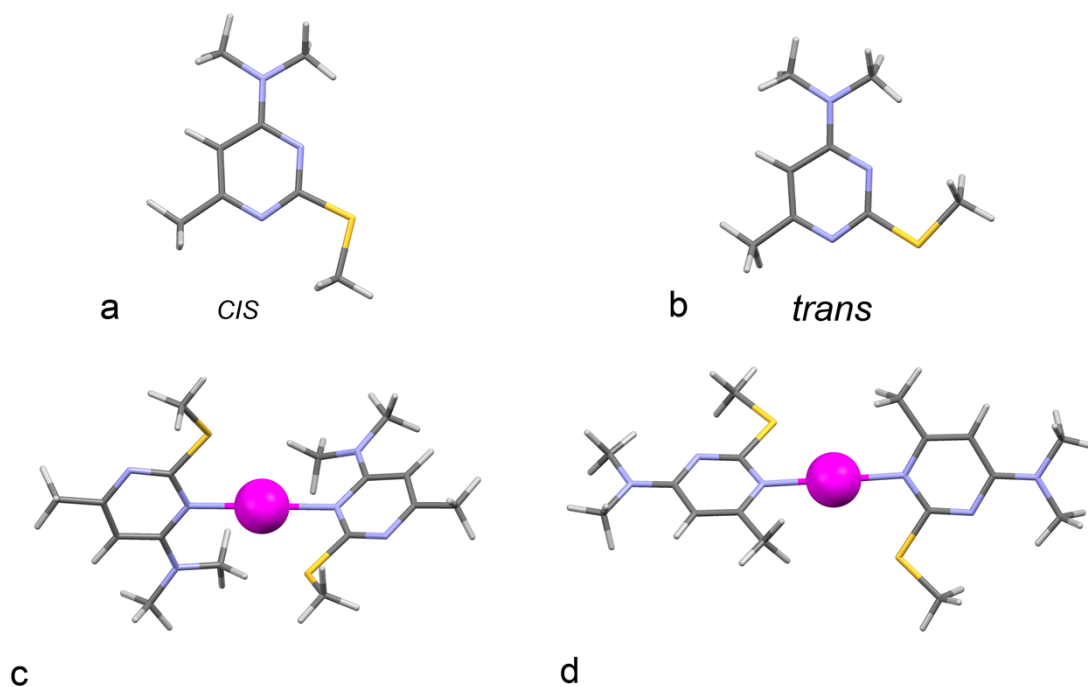

**Fig. 1** The optimized structures of (a) *cis* and (b) *trans* conformers of L1 and [AgL1<sub>2</sub>]<sup>+</sup> complex with (c) N3-Ag<sup>+</sup>-N3' and (d) N1-Ag<sup>+</sup>-N1' coordination modes.

**Coordinates of atoms for structure showed in figure 1a**

25

C8N3H13S

|   |              |              |              |
|---|--------------|--------------|--------------|
| N | 0.000730000  | 0.011132000  | -0.098800000 |
| C | 0.036200000  | 0.210549000  | 1.246387000  |
| C | 1.195564000  | -0.035227000 | -0.692545000 |
| C | 1.228131000  | 0.347058000  | 1.942920000  |
| C | -1.294230000 | 0.279679000  | 1.939504000  |
| C | 2.442329000  | 0.268103000  | 1.204016000  |
| H | 1.216011000  | 0.516396000  | 3.017410000  |
| N | 3.662711000  | 0.360906000  | 1.804104000  |
| N | 2.406367000  | 0.085383000  | -0.138178000 |
| C | 4.890371000  | 0.434021000  | 1.018969000  |
| C | 3.765395000  | 0.655142000  | 3.227644000  |
| H | 5.672464000  | -0.163768000 | 1.508113000  |
| H | 4.700351000  | 0.039953000  | 0.016512000  |
| H | 5.246005000  | 1.475344000  | 0.929787000  |
| H | 4.816097000  | 0.563558000  | 3.525577000  |
| H | 3.424912000  | 1.677256000  | 3.468622000  |
| H | 3.180512000  | -0.060223000 | 3.824085000  |
| S | 1.271486000  | -0.283192000 | -2.463851000 |
| C | -0.495600000 | -0.399305000 | -2.911687000 |
| H | -0.512283000 | -0.554549000 | -3.998055000 |

|   |              |              |              |
|---|--------------|--------------|--------------|
| H | -0.967997000 | -1.247493000 | -2.404452000 |
| H | -1.020581000 | 0.527764000  | -2.657100000 |
| H | -1.183764000 | 0.453064000  | 3.017570000  |
| H | -1.903798000 | 1.088252000  | 1.508422000  |
| H | -1.850094000 | -0.657617000 | 1.784935000  |

**Coordinates of atoms for structure showed in figure 1b**

25

C8N3H13S

|   |              |              |              |
|---|--------------|--------------|--------------|
| N | 2.477594000  | 0.092111000  | -0.100687000 |
| C | 1.287554000  | -0.036636000 | -0.680619000 |
| N | 0.072000000  | 0.005717000  | -0.113925000 |
| C | 0.071080000  | 0.212716000  | 1.225834000  |
| C | 1.247947000  | 0.362619000  | 1.951725000  |
| C | 2.477710000  | 0.286156000  | 1.244733000  |
| C | -1.275327000 | 0.277054000  | 1.887703000  |
| S | 1.212480000  | -0.299786000 | -2.449544000 |
| C | 2.977802000  | -0.308502000 | -2.914806000 |
| N | 3.683480000  | 0.392375000  | 1.871390000  |
| C | 3.753483000  | 0.663515000  | 3.301098000  |
| C | 4.932058000  | 0.465344000  | 1.121335000  |
| H | 1.207871000  | 0.540824000  | 3.024048000  |
| H | 5.675884000  | -0.208723000 | 1.571320000  |
| H | 4.745129000  | 0.165253000  | 0.086281000  |
| H | 5.337731000  | 1.491665000  | 1.129269000  |
| H | 4.795297000  | 0.554632000  | 3.623933000  |
| H | 3.418416000  | 1.686168000  | 3.547320000  |
| H | 3.144889000  | -0.053309000 | 3.871234000  |
| H | 2.994085000  | -0.465358000 | -4.000903000 |
| H | 3.447971000  | 0.650220000  | -2.669333000 |
| H | 3.507154000  | -1.125602000 | -2.412123000 |
| H | -1.190157000 | 0.457807000  | 2.966863000  |
| H | -1.880182000 | 1.078572000  | 1.437629000  |
| H | -1.820619000 | -0.665140000 | 1.726331000  |

**Coordinates of atoms for structure showed in figure 1c**

51

AgC16N6H26S2

|   |              |              |              |
|---|--------------|--------------|--------------|
| N | -4.048225000 | -1.781009000 | -4.066035000 |
| C | -2.895388000 | -1.212094000 | -3.776840000 |
| N | -2.074818000 | -0.518254000 | -4.601188000 |
| C | -2.511562000 | -0.330457000 | -5.882052000 |
| C | -3.722345000 | -0.954199000 | -6.296232000 |
| C | -4.453905000 | -1.671309000 | -5.367076000 |
| S | -2.256261000 | -1.288403000 | -2.104741000 |
| C | -3.214111000 | -2.665261000 | -1.377021000 |
| N | -1.780942000 | 0.441630000  | -6.720529000 |
| C | -2.148998000 | 0.540885000  | -8.134510000 |
| C | -5.740549000 | -2.351265000 | -5.717227000 |
| C | -0.637724000 | 1.212123000  | -6.246003000 |
| S | 2.326963000  | -1.954292000 | -4.793257000 |

|    |              |              |              |
|----|--------------|--------------|--------------|
| C  | 3.213861000  | -3.550838000 | -4.878809000 |
| C  | 2.972607000  | -1.232623000 | -3.285600000 |
| N  | 2.186137000  | -0.229757000 | -2.827524000 |
| C  | 2.633848000  | 0.443637000  | -1.726190000 |
| C  | 3.815650000  | -0.009095000 | -1.074345000 |
| C  | 4.511636000  | -1.072405000 | -1.619984000 |
| N  | 4.098905000  | -1.683522000 | -2.771344000 |
| N  | 1.941009000  | 1.520038000  | -1.285464000 |
| C  | 2.315660000  | 2.168817000  | -0.027119000 |
| C  | 5.766039000  | -1.606160000 | -1.001950000 |
| C  | 0.832816000  | 2.079198000  | -2.050424000 |
| H  | -4.082186000 | -0.859512000 | -7.317589000 |
| H  | -0.424515000 | 2.004528000  | -6.971634000 |
| H  | -0.865493000 | 1.683796000  | -5.280532000 |
| H  | 0.271599000  | 0.590601000  | -6.147576000 |
| H  | -1.347230000 | 1.062497000  | -8.666223000 |
| H  | -2.262922000 | -0.455933000 | -8.583573000 |
| H  | -3.084785000 | 1.105895000  | -8.270879000 |
| H  | -2.908144000 | -2.711319000 | -0.324949000 |
| H  | -4.282937000 | -2.441101000 | -1.452616000 |
| H  | -2.977091000 | -3.606524000 | -1.884014000 |
| H  | -6.001333000 | -2.212210000 | -6.773364000 |
| H  | -5.665620000 | -3.428604000 | -5.504948000 |
| H  | -6.556091000 | -1.958578000 | -5.091296000 |
| H  | 4.181416000  | 0.476678000  | -0.173306000 |
| H  | 0.659507000  | 3.107302000  | -1.714399000 |
| H  | 1.078441000  | 2.105216000  | -3.120643000 |
| H  | -0.104700000 | 1.512163000  | -1.900777000 |
| H  | 1.539921000  | 2.895478000  | 0.233307000  |
| H  | 2.383897000  | 1.436295000  | 0.789616000  |
| H  | 3.276905000  | 2.699577000  | -0.115480000 |
| H  | 2.905235000  | -4.007437000 | -5.826877000 |
| H  | 4.292603000  | -3.364659000 | -4.879852000 |
| H  | 2.930376000  | -4.191842000 | -4.037401000 |
| H  | 6.035277000  | -1.060846000 | -0.089307000 |
| H  | 5.640544000  | -2.672276000 | -0.759038000 |
| H  | 6.597618000  | -1.538034000 | -1.719525000 |
| Ag | 0.054753000  | -0.514591000 | -3.689390000 |

**Coordinates of atoms for structure showed in figure 1d**

51

AgC16N6H26S2

|   |              |              |              |
|---|--------------|--------------|--------------|
| C | 2.557389000  | 0.005723000  | 1.305240000  |
| N | 1.458513000  | -0.541557000 | 1.898693000  |
| C | 0.369633000  | -0.661764000 | 1.166753000  |
| N | 0.212674000  | -0.294518000 | -0.130183000 |
| C | 1.303776000  | 0.257535000  | -0.739562000 |
| C | 2.493352000  | 0.423079000  | -0.055536000 |
| S | -1.104009000 | -1.373154000 | 1.872149000  |
| C | -0.577439000 | -1.741787000 | 3.581261000  |
| C | 1.142719000  | 0.672104000  | -2.169076000 |
| N | 3.681785000  | 0.132382000  | 2.042465000  |

|    |              |              |              |
|----|--------------|--------------|--------------|
| C  | 3.748933000  | -0.281306000 | 3.441941000  |
| C  | 4.889884000  | 0.714055000  | 1.461011000  |
| H  | 3.346875000  | 0.866004000  | -0.562508000 |
| H  | 3.986843000  | 0.584161000  | 4.079068000  |
| H  | 2.784631000  | -0.699405000 | 3.742107000  |
| H  | 4.533978000  | -1.041649000 | 3.570824000  |
| H  | 5.679224000  | 0.699827000  | 2.219592000  |
| H  | 5.235436000  | 0.133469000  | 0.592175000  |
| H  | 4.724806000  | 1.757964000  | 1.152302000  |
| H  | -1.456342000 | -2.186320000 | 4.064158000  |
| H  | 0.251589000  | -2.457264000 | 3.576671000  |
| H  | -0.290389000 | -0.819526000 | 4.097292000  |
| H  | 2.074647000  | 1.082804000  | -2.575678000 |
| H  | 0.841045000  | -0.188471000 | -2.786801000 |
| H  | 0.355529000  | 1.437309000  | -2.258971000 |
| Ag | -1.718709000 | -0.610718000 | -1.145921000 |
| N  | -3.653781000 | -0.873594000 | -2.169399000 |
| C  | -4.828678000 | -0.349892000 | -1.709173000 |
| C  | -3.724543000 | -1.590351000 | -3.319616000 |
| C  | -6.013827000 | -0.552013000 | -2.390984000 |
| N  | -4.802209000 | -1.833422000 | -4.037575000 |
| C  | -5.983939000 | -1.320209000 | -3.590538000 |
| N  | -7.097623000 | -1.564632000 | -4.314148000 |
| C  | -7.069581000 | -2.336979000 | -5.553930000 |
| C  | -8.392116000 | -1.038247000 | -3.886407000 |
| H  | -7.420898000 | -1.715593000 | -6.391812000 |
| H  | -6.046636000 | -2.668048000 | -5.750669000 |
| H  | -7.727830000 | -3.214238000 | -5.463916000 |
| H  | -9.154220000 | -1.378873000 | -4.594846000 |
| H  | -8.662418000 | -1.406243000 | -2.885067000 |
| H  | -8.395054000 | 0.062803000  | -3.876862000 |
| S  | -2.145248000 | -2.233332000 | -3.837159000 |
| C  | -2.572349000 | -3.121500000 | -5.374131000 |
| H  | -1.627159000 | -3.546414000 | -5.733810000 |
| H  | -3.288007000 | -3.922799000 | -5.161966000 |
| H  | -2.978599000 | -2.425626000 | -6.115731000 |
| H  | -6.934937000 | -0.123094000 | -2.004582000 |
| C  | -4.763307000 | 0.449380000  | -0.444934000 |
| H  | -5.755845000 | 0.802963000  | -0.141095000 |
| H  | -4.343172000 | -0.158133000 | 0.372099000  |
| H  | -4.107139000 | 1.323890000  | -0.579241000 |

**The optimized structures of compound L3, its complexes and coordinates for geometry-optimized structures**

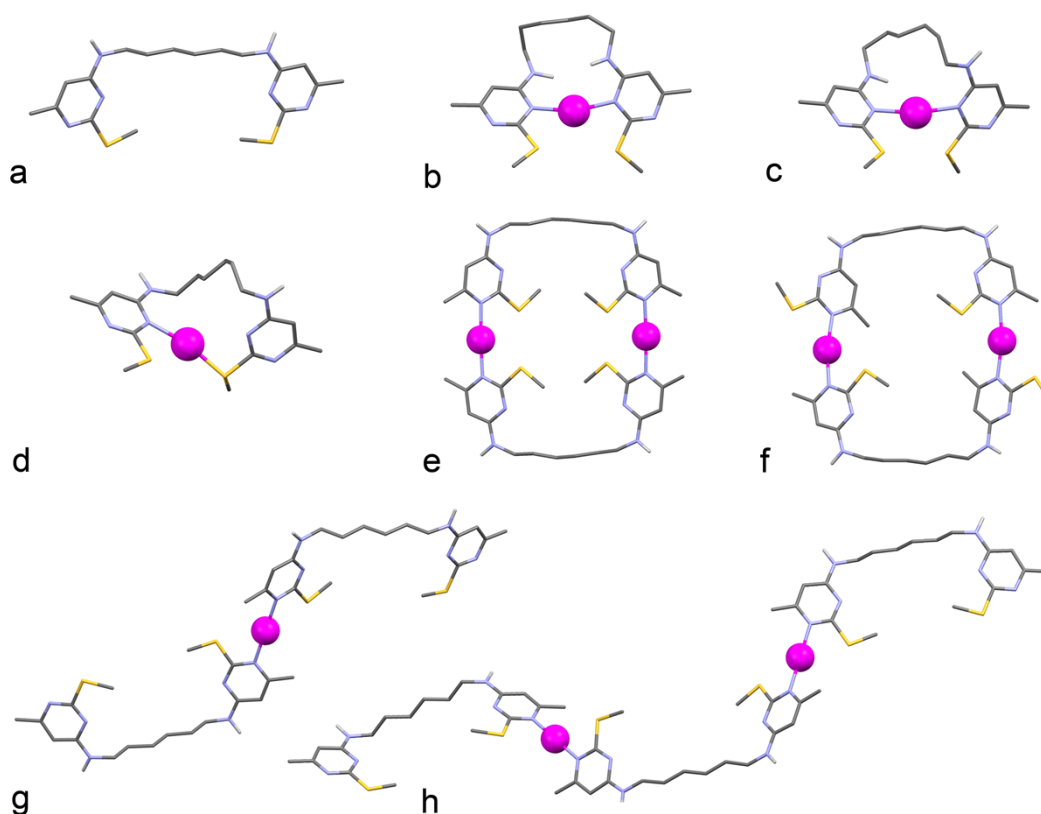

**Fig. 2** The optimized structures of (a) compound L3 and its complexes:  $[\text{AgL3}]^+$  with the (b) N3-Ag<sup>+</sup>-N3 (*cis/cis* oriented NH groups), (c) N3-Ag<sup>+</sup>-N3 (*trans/cis* oriented NH groups), (d) S-Ag<sup>+</sup>-N3 (*trans/trans* oriented NH groups) coordination modes;  $[\text{Ag}_2\text{L}_3]^{2+}$  with the (e) N1-Ag<sup>+</sup>-N1 (*cis/cis* oriented SCH<sub>3</sub> groups) and (f) *trans/trans* oriented SCH<sub>3</sub> groups; (g)  $[\text{AgL}_3]^{2+}$  and (h)  $[\text{Ag}_2\text{L}_3]^{2+}$ . Only hydrogen atoms of NH groups are shown.

**Coordinates of atoms for structure showed in figure 2a**

54

C18N6H28S2

|   |              |              |             |
|---|--------------|--------------|-------------|
| N | 2.121502000  | 0.201631000  | 1.408735000 |
| C | 2.643846000  | 1.426706000  | 1.137869000 |
| C | 1.854366000  | 2.567655000  | 1.111312000 |
| C | 0.469123000  | 2.416469000  | 1.375262000 |
| N | -0.058635000 | 1.198404000  | 1.641968000 |
| C | 0.803540000  | 0.179514000  | 1.644856000 |
| N | -0.367053000 | 3.488680000  | 1.388642000 |
| H | 0.026179000  | 4.380416000  | 1.104256000 |
| C | 4.120106000  | 1.474999000  | 0.869249000 |
| S | 0.187609000  | -1.463851000 | 1.993461000 |
| C | -1.594220000 | -1.161751000 | 2.254692000 |
| C | -1.814142000 | 3.398022000  | 1.541526000 |
| C | -2.561115000 | 3.142605000  | 0.225547000 |

|   |               |              |              |
|---|---------------|--------------|--------------|
| C | -4.073073000  | 3.014568000  | 0.430239000  |
| C | -4.841022000  | 2.759368000  | -0.870705000 |
| C | -6.347373000  | 2.584357000  | -0.659587000 |
| C | -7.095025000  | 2.328767000  | -1.975132000 |
| N | -8.527467000  | 2.116193000  | -1.806011000 |
| H | -9.125707000  | 2.933917000  | -1.742098000 |
| C | -9.091369000  | 0.916879000  | -1.501778000 |
| N | -8.286465000  | -0.171464000 | -1.471231000 |
| C | -8.887010000  | -1.330956000 | -1.195043000 |
| N | -10.180606000 | -1.558764000 | -0.934370000 |
| C | -10.982088000 | -0.461522000 | -0.962898000 |
| C | -10.481277000 | 0.801698000  | -1.244348000 |
| S | -7.894344000  | -2.818690000 | -1.141021000 |
| C | -6.226796000  | -2.185025000 | -1.531192000 |
| C | -12.436648000 | -0.693439000 | -0.672502000 |
| H | -11.131895000 | 1.677240000  | -1.268233000 |
| H | -6.965219000  | 3.182118000  | -2.658428000 |
| H | -6.681493000  | 1.438413000  | -2.469233000 |
| H | -5.564518000  | -3.059284000 | -1.493291000 |
| H | -6.204538000  | -1.742227000 | -2.533001000 |
| H | -5.912342000  | -1.443842000 | -0.788120000 |
| H | -13.012589000 | 0.240078000  | -0.709561000 |
| H | -12.859278000 | -1.402222000 | -1.400529000 |
| H | -12.555672000 | -1.147120000 | 0.322973000  |
| H | -6.764642000  | 3.482525000  | -0.172394000 |
| H | -6.532095000  | 1.735861000  | 0.019614000  |
| H | -4.435520000  | 1.855626000  | -1.359643000 |
| H | -4.660242000  | 3.594765000  | -1.570742000 |
| H | -4.460452000  | 3.932225000  | 0.908208000  |
| H | -4.275203000  | 2.190826000  | 1.137939000  |
| H | -2.166967000  | 2.218458000  | -0.228346000 |
| H | -2.346519000  | 3.963823000  | -0.479969000 |
| H | -2.158672000  | 4.338858000  | 1.997740000  |
| H | -2.024521000  | 2.585353000  | 2.250838000  |
| H | 2.281829000   | 3.548110000  | 0.895833000  |
| H | -2.032536000  | -2.147640000 | 2.455393000  |
| H | -1.753913000  | -0.499867000 | 3.112945000  |
| H | -2.047025000  | -0.725702000 | 1.357359000  |
| H | 4.460730000   | 2.495425000  | 0.651908000  |
| H | 4.675316000   | 1.091519000  | 1.738579000  |
| H | 4.370648000   | 0.825663000  | 0.016891000  |

**Coordinates of atoms for structure showed in figure 2b**

55

AgC18N6H28S2

|   |              |              |             |
|---|--------------|--------------|-------------|
| C | 1.719067000  | 0.551392000  | 0.225087000 |
| N | 0.490303000  | 0.653411000  | 0.702184000 |
| C | 0.297096000  | 0.204028000  | 1.974998000 |
| C | 1.338202000  | -0.306988000 | 2.736806000 |
| C | 2.626425000  | -0.365525000 | 2.155595000 |
| N | 2.801648000  | 0.049848000  | 0.867359000 |
| C | -1.097453000 | 0.308744000  | 2.507748000 |



|    |              |              |              |
|----|--------------|--------------|--------------|
| N  | 3.712823000  | -0.837883000 | 2.803113000  |
| C  | 3.745015000  | -1.369733000 | 4.167275000  |
| S  | 2.100561000  | 1.105022000  | -1.422177000 |
| H  | 1.173063000  | -0.636291000 | 3.760671000  |
| H  | 4.613801000  | -0.629990000 | 2.372983000  |
| H  | -1.171917000 | -0.070675000 | 3.533898000  |
| H  | -1.429542000 | 1.357668000  | 2.486991000  |
| H  | -1.787704000 | -0.256872000 | 1.863756000  |
| C  | 5.104173000  | -2.023034000 | 4.423518000  |
| H  | 2.936426000  | -2.110043000 | 4.276399000  |
| H  | 5.163324000  | -2.283076000 | 5.490104000  |
| C  | 5.385525000  | -3.260062000 | 3.542382000  |
| H  | 5.885724000  | -1.260085000 | 4.257985000  |
| C  | 6.830426000  | -3.298482000 | 3.029486000  |
| H  | 5.158359000  | -4.181573000 | 4.102509000  |
| H  | 4.689402000  | -3.252794000 | 2.686291000  |
| C  | 7.180531000  | -4.470083000 | 2.103629000  |
| H  | 7.039746000  | -2.351266000 | 2.501053000  |
| H  | 7.521953000  | -3.315806000 | 3.888025000  |
| H  | 8.230723000  | -4.362958000 | 1.788688000  |
| H  | 7.119858000  | -5.424645000 | 2.652151000  |
| C  | 6.281299000  | -4.611522000 | 0.860300000  |
| H  | 6.718491000  | -5.337001000 | 0.157674000  |
| H  | 5.298895000  | -5.011871000 | 1.143389000  |
| N  | 6.010009000  | -3.358651000 | 0.154791000  |
| H  | 5.125835000  | -2.895273000 | 0.358545000  |
| C  | 6.852426000  | -2.679568000 | -0.651073000 |
| N  | 6.445574000  | -1.448798000 | -1.079600000 |
| C  | 7.271107000  | -0.779655000 | -1.921227000 |
| N  | 8.447023000  | -1.184950000 | -2.367641000 |
| C  | 8.870660000  | -2.406106000 | -1.931104000 |
| C  | 8.106589000  | -3.181988000 | -1.073008000 |
| S  | 6.609169000  | 0.795228000  | -2.416237000 |
| C  | 10.205063000 | -2.860148000 | -2.434263000 |
| H  | 8.458507000  | -4.155546000 | -0.738056000 |
| H  | 10.477162000 | -3.845625000 | -2.037567000 |
| H  | 10.195462000 | -2.905545000 | -3.533749000 |
| H  | 10.980087000 | -2.131681000 | -2.151980000 |
| C  | 7.954422000  | 1.481301000  | -3.443121000 |
| H  | 7.586272000  | 2.456833000  | -3.783420000 |
| H  | 8.862228000  | 1.606273000  | -2.844045000 |
| H  | 8.141598000  | 0.826552000  | -4.300236000 |
| C  | 0.451998000  | 1.522277000  | -2.087878000 |
| H  | 0.637540000  | 1.886987000  | -3.105485000 |
| H  | -0.184638000 | 0.631885000  | -2.114221000 |
| H  | -0.005973000 | 2.309659000  | -1.480767000 |
| Ag | 4.608315000  | -0.426787000 | -0.345125000 |
| H  | 3.565859000  | -0.563787000 | 4.899193000  |

## Coordinates of atoms for structure showed in figure 2c

55

AgC18N6H28S2

|   |              |              |              |
|---|--------------|--------------|--------------|
| C | 1.679697000  | 0.378344000  | 0.437284000  |
| N | 0.476530000  | 0.037714000  | 0.864123000  |
| C | 0.387109000  | -0.354581000 | 2.167639000  |
| C | 1.490922000  | -0.357142000 | 3.006527000  |
| C | 2.740374000  | 0.041117000  | 2.474864000  |
| N | 2.830965000  | 0.371634000  | 1.154645000  |
| C | -0.973275000 | -0.757431000 | 2.644242000  |
| N | 3.872828000  | 0.126151000  | 3.212399000  |
| C | 4.203559000  | -0.686658000 | 4.387770000  |
| S | 1.922444000  | 0.907923000  | -1.245203000 |
| H | 1.390069000  | -0.623007000 | 4.056956000  |
| H | 4.674154000  | 0.523887000  | 2.720187000  |
| H | -0.963724000 | -1.057746000 | 3.698900000  |
| H | -1.679824000 | 0.076064000  | 2.514060000  |
| H | -1.350515000 | -1.593238000 | 2.035695000  |
| C | 5.432257000  | -1.561379000 | 4.098237000  |
| H | 3.335402000  | -1.313715000 | 4.630665000  |
| H | 5.678234000  | -2.126789000 | 5.011178000  |
| C | 5.233940000  | -2.502256000 | 2.905158000  |
| H | 6.295040000  | -0.898588000 | 3.906147000  |
| C | 6.523522000  | -3.149418000 | 2.384423000  |
| H | 4.501587000  | -3.286112000 | 3.162738000  |
| H | 4.773139000  | -1.925361000 | 2.085193000  |
| C | 6.381182000  | -3.698128000 | 0.955512000  |
| H | 7.342149000  | -2.408868000 | 2.404975000  |
| H | 6.832987000  | -3.964061000 | 3.057710000  |
| H | 7.221172000  | -4.375005000 | 0.724101000  |
| H | 5.468309000  | -4.309848000 | 0.874873000  |
| C | 6.317127000  | -2.616200000 | -0.128522000 |
| H | 6.040668000  | -3.062329000 | -1.099005000 |
| H | 5.534185000  | -1.877842000 | 0.109634000  |
| N | 7.598550000  | -1.926407000 | -0.244682000 |
| H | 8.416791000  | -2.528160000 | -0.174277000 |
| C | 7.858905000  | -0.678269000 | -0.694506000 |
| N | 6.864456000  | 0.230416000  | -0.886429000 |
| C | 7.244007000  | 1.434959000  | -1.398228000 |
| N | 8.459892000  | 1.849421000  | -1.680357000 |
| C | 9.473498000  | 0.966205000  | -1.418256000 |
| C | 9.208990000  | -0.300546000 | -0.941897000 |
| S | 5.841895000  | 2.493415000  | -1.729395000 |
| C | 10.861583000 | 1.449502000  | -1.697567000 |
| H | 10.013268000 | -1.013253000 | -0.755899000 |
| H | 11.612846000 | 0.682345000  | -1.474329000 |
| H | 10.951814000 | 1.744607000  | -2.753848000 |
| H | 11.074756000 | 2.346287000  | -1.096147000 |
| C | 6.619765000  | 4.138678000  | -1.898982000 |
| H | 5.803326000  | 4.820567000  | -2.165367000 |
| H | 7.078774000  | 4.444847000  | -0.953076000 |
| H | 7.364516000  | 4.104608000  | -2.700521000 |

|    |              |              |              |
|----|--------------|--------------|--------------|
| C  | 0.297116000  | 0.555563000  | -2.000117000 |
| H  | 0.390294000  | 0.875582000  | -3.045084000 |
| H  | 0.076754000  | -0.515843000 | -1.949779000 |
| H  | -0.481577000 | 1.135275000  | -1.494330000 |
| Ag | 4.747343000  | 0.433859000  | -0.027436000 |
| H  | 4.393918000  | -0.032958000 | 5.252492000  |

**Coordinates of atoms for structure showed in figure 2d**

55

AgC<sub>18</sub>N<sub>6</sub>H<sub>28</sub>S<sub>2</sub>

|   |              |              |              |
|---|--------------|--------------|--------------|
| C | -0.232094000 | -0.829560000 | 2.242598000  |
| N | -1.166410000 | -1.588351000 | 2.776894000  |
| C | -0.878313000 | -2.128947000 | 4.000507000  |
| C | 0.329375000  | -1.888282000 | 4.620840000  |
| C | 1.289865000  | -1.066550000 | 3.966430000  |
| N | 0.994178000  | -0.526605000 | 2.755421000  |
| C | -1.941861000 | -2.985404000 | 4.612727000  |
| N | 2.474593000  | -0.839409000 | 4.580434000  |
| C | 3.628626000  | -0.064428000 | 4.140718000  |
| S | -0.513167000 | -0.072416000 | 0.653415000  |
| H | 0.558546000  | -2.316931000 | 5.597046000  |
| H | 2.579368000  | -1.304679000 | 5.478463000  |
| H | -1.636238000 | -3.379154000 | 5.589652000  |
| H | -2.868754000 | -2.404621000 | 4.733595000  |
| H | -2.177427000 | -3.827123000 | 3.943989000  |
| C | 4.745477000  | -0.900500000 | 3.503884000  |
| H | 4.017566000  | 0.462311000  | 5.024580000  |
| H | 5.081272000  | -1.655762000 | 4.234740000  |
| C | 4.362815000  | -1.583286000 | 2.189748000  |
| H | 5.604327000  | -0.227835000 | 3.337889000  |
| C | 5.522440000  | -2.359452000 | 1.557220000  |
| H | 3.509884000  | -2.264181000 | 2.351192000  |
| H | 4.019241000  | -0.808814000 | 1.475358000  |
| C | 5.169547000  | -3.072114000 | 0.245482000  |
| H | 6.369809000  | -1.672914000 | 1.386978000  |
| H | 5.883164000  | -3.113695000 | 2.276630000  |
| H | 6.030954000  | -3.680701000 | -0.076950000 |
| H | 4.340175000  | -3.779974000 | 0.413530000  |
| C | 4.755140000  | -2.149122000 | -0.911201000 |
| H | 4.514739000  | -2.759883000 | -1.795793000 |
| H | 3.858427000  | -1.569659000 | -0.662130000 |
| N | 5.797297000  | -1.193976000 | -1.275349000 |
| H | 6.676118000  | -1.573710000 | -1.618893000 |
| C | 5.737724000  | 0.148375000  | -1.133051000 |
| N | 4.592685000  | 0.712411000  | -0.665243000 |
| C | 4.610369000  | 2.042558000  | -0.579957000 |
| N | 5.573801000  | 2.901892000  | -0.848862000 |
| C | 6.741822000  | 2.335172000  | -1.290851000 |
| C | 6.855411000  | 0.967981000  | -1.456911000 |
| S | 2.993600000  | 2.732491000  | -0.099790000 |
| C | 7.865635000  | 3.279193000  | -1.586745000 |
| H | 7.782999000  | 0.521393000  | -1.817845000 |

|    |              |              |              |
|----|--------------|--------------|--------------|
| H  | 8.758532000  | 2.749423000  | -1.940616000 |
| H  | 7.554928000  | 4.007245000  | -2.351180000 |
| H  | 8.124351000  | 3.853300000  | -0.684125000 |
| C  | 3.451879000  | 4.286594000  | 0.750602000  |
| H  | 2.507010000  | 4.778398000  | 1.009727000  |
| H  | 4.041366000  | 4.082736000  | 1.649863000  |
| H  | 4.019640000  | 4.899254000  | 0.042981000  |
| C  | -2.203367000 | -0.628732000 | 0.238967000  |
| H  | -2.419104000 | -0.185826000 | -0.741032000 |
| H  | -2.233063000 | -1.721427000 | 0.178309000  |
| H  | -2.913289000 | -0.262026000 | 0.987418000  |
| Ag | 2.157071000  | 0.911432000  | 1.411521000  |
| H  | 3.287323000  | 0.727696000  | 3.449651000  |

**Coordinates of atoms for structure showed in figure 2e**

110

Ag<sub>2</sub>C<sub>36</sub>N<sub>12</sub>H<sub>56</sub>S<sub>4</sub>

|    |              |              |              |
|----|--------------|--------------|--------------|
| C  | -0.124768000 | -6.757707000 | 13.350600000 |
| N  | -0.743069000 | -6.114493000 | 12.310914000 |
| C  | 0.063968000  | -5.606574000 | 11.348725000 |
| N  | 1.381725000  | -5.684308000 | 11.294980000 |
| C  | 2.003647000  | -6.329821000 | 12.315755000 |
| C  | 1.249984000  | -6.877785000 | 13.389526000 |
| Ag | -2.934511000 | -5.949958000 | 12.079965000 |
| N  | -5.110446000 | -5.780147000 | 11.734896000 |
| C  | -5.990000000 | -5.215775000 | 12.620720000 |
| C  | -7.326932000 | -5.084966000 | 12.302213000 |
| C  | -7.761703000 | -5.536996000 | 11.026340000 |
| N  | -6.883637000 | -6.105384000 | 10.159516000 |
| C  | -5.626880000 | -6.201118000 | 10.555377000 |
| N  | -9.046786000 | -5.430446000 | 10.631980000 |
| C  | -9.519017000 | -5.802846000 | 9.299219000  |
| C  | -9.272111000 | -4.714266000 | 8.243100000  |
| C  | -9.391638000 | -5.248846000 | 6.812729000  |
| C  | -9.096878000 | -4.184553000 | 5.747427000  |
| C  | -8.780584000 | -4.782693000 | 4.373311000  |
| C  | -8.437585000 | -3.707316000 | 3.330697000  |
| N  | -7.774613000 | -4.245264000 | 2.143639000  |
| C  | -5.427898000 | -4.757661000 | 13.930091000 |
| S  | -4.418362000 | -6.936286000 | 9.473684000  |
| C  | -5.436868000 | -7.409452000 | 8.033450000  |
| S  | -0.820754000 | -4.773910000 | 10.046908000 |
| C  | 0.539374000  | -4.201957000 | 8.970628000  |
| N  | 3.348422000  | -6.418181000 | 12.270379000 |
| C  | 4.154379000  | -5.942200000 | 11.147100000 |
| C  | 4.210655000  | -6.936645000 | 9.976970000  |
| C  | 4.701605000  | -6.286183000 | 8.680095000  |
| C  | 4.712690000  | -7.253934000 | 7.489300000  |
| C  | 4.765421000  | -6.538717000 | 6.135908000  |
| C  | 4.723711000  | -7.518391000 | 4.952756000  |
| N  | 4.391579000  | -6.874882000 | 3.682534000  |
| C  | 3.132171000  | -6.582045000 | 3.299838000  |

|    |              |              |              |
|----|--------------|--------------|--------------|
| C  | 2.856591000  | -5.881544000 | 2.093766000  |
| C  | 1.539485000  | -5.607157000 | 1.784193000  |
| N  | 0.525798000  | -6.012932000 | 2.611648000  |
| C  | 0.889912000  | -6.694789000 | 3.724123000  |
| N  | 2.119122000  | -6.990249000 | 4.107655000  |
| S  | -0.489810000 | -7.199486000 | 4.730377000  |
| C  | 0.339779000  | -8.091149000 | 6.091265000  |
| Ag | -1.608383000 | -5.542891000 | 2.284177000  |
| N  | -3.756911000 | -5.073233000 | 2.070467000  |
| C  | -4.409812000 | -4.483639000 | 3.100590000  |
| N  | -5.698931000 | -4.202346000 | 3.166661000  |
| C  | -6.456599000 | -4.524240000 | 2.085959000  |
| C  | -5.864080000 | -5.123769000 | 0.941097000  |
| C  | -4.510004000 | -5.391146000 | 0.971082000  |
| C  | 1.143506000  | -4.863356000 | 0.547159000  |
| S  | -3.352994000 | -4.090936000 | 4.478987000  |
| C  | -4.520012000 | -3.294062000 | 5.635968000  |
| C  | -1.009961000 | -7.312133000 | 14.422679000 |
| H  | 5.150549000  | -6.531042000 | 3.100915000  |
| C  | -3.792439000 | -6.032497000 | -0.175272000 |
| H  | -9.693875000 | -4.965320000 | 11.262438000 |
| H  | 3.809615000  | -6.939444000 | 13.010728000 |
| H  | 3.661655000  | -5.559358000 | 1.433411000  |
| H  | 5.692041000  | -8.021194000 | 4.822448000  |
| H  | 3.966048000  | -8.292020000 | 5.141268000  |
| H  | -0.462574000 | -8.387964000 | 6.777979000  |
| H  | 0.855156000  | -8.979125000 | 5.710547000  |
| H  | 1.048218000  | -7.428411000 | 6.599491000  |
| H  | 2.019367000  | -4.572377000 | -0.044864000 |
| H  | 0.490856000  | -5.488946000 | -0.082048000 |
| H  | 0.582325000  | -3.952771000 | 0.810583000  |
| H  | 5.666111000  | -5.906484000 | 6.065728000  |
| H  | 3.895819000  | -5.865855000 | 6.057460000  |
| H  | 3.796885000  | -7.871798000 | 7.519676000  |
| H  | 5.558044000  | -7.956637000 | 7.585796000  |
| H  | 5.707977000  | -5.856535000 | 8.822730000  |
| H  | 4.036635000  | -5.435224000 | 8.445456000  |
| H  | 3.195274000  | -7.332529000 | 9.811593000  |
| H  | 4.848393000  | -7.794852000 | 10.246537000 |
| H  | 5.161038000  | -5.729055000 | 11.532659000 |
| H  | 3.718255000  | -4.993463000 | 10.803854000 |
| H  | 1.740245000  | -7.388309000 | 14.218385000 |
| H  | 0.051578000  | -3.718070000 | 8.115440000  |
| H  | 1.170402000  | -3.480410000 | 9.499996000  |
| H  | 1.137438000  | -5.055192000 | 8.633385000  |
| H  | -0.428142000 | -7.813128000 | 15.205490000 |
| H  | -1.596950000 | -6.504939000 | 14.888601000 |
| H  | -1.719266000 | -8.039054000 | 13.996110000 |
| H  | -6.461271000 | -5.375845000 | 0.064859000  |
| H  | -9.342049000 | -3.183479000 | 2.991732000  |
| H  | -7.765061000 | -2.961714000 | 3.777831000  |
| H  | -3.932641000 | -3.069130000 | 6.534764000  |
| H  | -4.915741000 | -2.368366000 | 5.205225000  |

|   |               |              |              |
|---|---------------|--------------|--------------|
| H | -5.337658000  | -3.980848000 | 5.879205000  |
| H | -9.623160000  | -5.396271000 | 4.013482000  |
| H | -7.913777000  | -5.456470000 | 4.472111000  |
| H | -8.228818000  | -3.582280000 | 6.071635000  |
| H | -9.945194000  | -3.482526000 | 5.674925000  |
| H | -10.394293000 | -5.678308000 | 6.645486000  |
| H | -8.677801000  | -6.084077000 | 6.693611000  |
| H | -8.254025000  | -4.317391000 | 8.388240000  |
| H | -9.968394000  | -3.874307000 | 8.402979000  |
| H | -10.589661000 | -6.035289000 | 9.383643000  |
| H | -8.996987000  | -6.725017000 | 9.007373000  |
| H | -8.025587000  | -4.637216000 | 13.008896000 |
| H | -4.733776000  | -7.830004000 | 7.303910000  |
| H | -6.177651000  | -8.163852000 | 8.318357000  |
| H | -5.933276000  | -6.526727000 | 7.616589000  |
| H | -6.203088000  | -4.317527000 | 14.568578000 |
| H | -4.973833000  | -5.604738000 | 14.468094000 |
| H | -4.641241000  | -4.004015000 | 13.766727000 |
| H | -4.476100000  | -6.257391000 | -1.002513000 |
| H | -3.000027000  | -5.365891000 | -0.550673000 |
| H | -3.315284000  | -6.971216000 | 0.148134000  |
| H | -8.348635000  | -4.526336000 | 1.353704000  |

**Coordinates of atoms for structure showed in figure 2f**

110

Ag<sub>2</sub>C<sub>36</sub>N<sub>12</sub>H<sub>56</sub>S<sub>4</sub>

|    |              |              |              |
|----|--------------|--------------|--------------|
| C  | -0.163646000 | -5.262853000 | 11.273791000 |
| N  | -0.855906000 | -5.834240000 | 12.301173000 |
| C  | -0.126299000 | -6.525208000 | 13.215367000 |
| N  | 1.178942000  | -6.721152000 | 13.199821000 |
| C  | 1.874027000  | -6.181277000 | 12.159777000 |
| C  | 1.206613000  | -5.416792000 | 11.167212000 |
| Ag | -3.066308000 | -5.851827000 | 12.346409000 |
| N  | -5.247552000 | -5.809850000 | 11.984667000 |
| C  | -6.177203000 | -5.265368000 | 12.830849000 |
| C  | -7.503169000 | -5.173889000 | 12.456479000 |
| C  | -7.872053000 | -5.640360000 | 11.165131000 |
| N  | -6.944671000 | -6.195687000 | 10.341410000 |
| C  | -5.705399000 | -6.257493000 | 10.792092000 |
| N  | -9.140037000 | -5.562894000 | 10.712942000 |
| C  | -9.544475000 | -5.952486000 | 9.363003000  |
| C  | -9.300120000 | -4.854708000 | 8.315287000  |
| C  | -9.334947000 | -5.397350000 | 6.883275000  |
| C  | -9.078541000 | -4.317801000 | 5.822880000  |
| C  | -8.662331000 | -4.900385000 | 4.468672000  |
| C  | -8.414222000 | -3.817537000 | 3.404494000  |
| N  | -7.632720000 | -4.291495000 | 2.266168000  |
| C  | -5.679234000 | -4.785549000 | 14.157825000 |
| S  | -4.438539000 | -6.998335000 | 9.778370000  |
| C  | -5.372118000 | -7.460466000 | 8.277506000  |
| S  | -1.120065000 | -7.195062000 | 14.528662000 |
| C  | 0.112581000  | -8.090867000 | 15.534616000 |
| N  | 3.202758000  | -6.406239000 | 12.148763000 |

|    |              |              |              |
|----|--------------|--------------|--------------|
| C  | 4.102875000  | -6.033474000 | 11.061364000 |
| C  | 4.046620000  | -6.998113000 | 9.864805000  |
| C  | 4.642569000  | -6.397150000 | 8.588012000  |
| C  | 4.606742000  | -7.368409000 | 7.400059000  |
| C  | 4.753229000  | -6.669521000 | 6.044947000  |
| C  | 4.713289000  | -7.659402000 | 4.869536000  |
| N  | 4.451046000  | -7.017553000 | 3.582273000  |
| C  | 3.216476000  | -6.697028000 | 3.144789000  |
| C  | 3.007680000  | -5.995839000 | 1.925742000  |
| C  | 1.712181000  | -5.681198000 | 1.565902000  |
| N  | 0.656635000  | -6.054692000 | 2.355297000  |
| C  | 0.957796000  | -6.750888000 | 3.476388000  |
| N  | 2.160578000  | -7.079099000 | 3.910242000  |
| S  | -0.477588000 | -7.243738000 | 4.413554000  |
| C  | 0.274066000  | -8.122161000 | 5.828141000  |
| Ag | -1.449012000 | -5.463184000 | 2.029850000  |
| N  | -3.572537000 | -4.854670000 | 2.118742000  |
| C  | -4.448040000 | -5.197049000 | 1.138007000  |
| N  | -5.756600000 | -5.024201000 | 1.151304000  |
| C  | -6.294176000 | -4.447827000 | 2.262640000  |
| C  | -5.460087000 | -4.032524000 | 3.333511000  |
| C  | -4.098888000 | -4.250458000 | 3.222847000  |
| C  | 1.383445000  | -4.926636000 | 0.316248000  |
| S  | -3.654979000 | -5.946760000 | -0.265546000 |
| C  | -5.069106000 | -6.329992000 | -1.355097000 |
| C  | -0.952848000 | -4.470161000 | 10.278401000 |
| H  | 5.242153000  | -6.695918000 | 3.031506000  |
| C  | -3.140002000 | -3.839276000 | 4.296857000  |
| H  | -9.824882000 | -5.110425000 | 11.312028000 |
| H  | 3.553487000  | -7.001609000 | 12.896647000 |
| H  | 3.846674000  | -5.699856000 | 1.296056000  |
| H  | 5.664811000  | -8.201519000 | 4.778990000  |
| H  | 3.919160000  | -8.400103000 | 5.038146000  |
| H  | -0.568604000 | -8.446859000 | 6.451009000  |
| H  | 0.837004000  | -8.992959000 | 5.476602000  |
| H  | 0.925024000  | -7.445762000 | 6.392081000  |
| H  | 2.287057000  | -4.675159000 | -0.251591000 |
| H  | 0.720507000  | -5.524818000 | -0.328197000 |
| H  | 0.854453000  | -3.991886000 | 0.561469000  |
| H  | 5.687496000  | -6.084871000 | 6.009057000  |
| H  | 3.923306000  | -5.954315000 | 5.924138000  |
| H  | 3.644606000  | -7.911900000 | 7.406835000  |
| H  | 5.390862000  | -8.134982000 | 7.523464000  |
| H  | 5.679605000  | -6.066092000 | 8.768240000  |
| H  | 4.071406000  | -5.487375000 | 8.328421000  |
| H  | 2.993039000  | -7.263446000 | 9.673466000  |
| H  | 4.561447000  | -7.936732000 | 10.127696000 |
| H  | 5.117961000  | -5.990169000 | 11.478758000 |
| H  | 3.857457000  | -5.009682000 | 10.737449000 |
| H  | 1.740847000  | -4.958926000 | 10.337811000 |
| H  | -0.455569000 | -8.524325000 | 16.366726000 |
| H  | 0.581162000  | -8.884570000 | 14.943451000 |
| H  | 0.867122000  | -7.394769000 | 15.915386000 |

|   |               |              |              |
|---|---------------|--------------|--------------|
| H | -0.310251000  | -4.068286000 | 9.485735000  |
| H | -1.731814000  | -5.097565000 | 9.815955000  |
| H | -1.458968000  | -3.628874000 | 10.777225000 |
| H | -5.862023000  | -3.554580000 | 4.223996000  |
| H | -9.365042000  | -3.434120000 | 3.010286000  |
| H | -7.894859000  | -2.955699000 | 3.852570000  |
| H | -4.628886000  | -6.798355000 | -2.243866000 |
| H | -5.752016000  | -7.027871000 | -0.859516000 |
| H | -5.591649000  | -5.409036000 | -1.633732000 |
| H | -9.423798000  | -5.607332000 | 4.100596000  |
| H | -7.735285000  | -5.483164000 | 4.603249000  |
| H | -8.274941000  | -3.647454000 | 6.178014000  |
| H | -9.975847000  | -3.685820000 | 5.708857000  |
| H | -10.300368000 | -5.893126000 | 6.683722000  |
| H | -8.563315000  | -6.183173000 | 6.792247000  |
| H | -8.307870000  | -4.412266000 | 8.501691000  |
| H | -10.039830000 | -4.046796000 | 8.442079000  |
| H | -10.607661000 | -6.227125000 | 9.404727000  |
| H | -8.974933000  | -6.852943000 | 9.093587000  |
| H | -8.242374000  | -4.741858000 | 13.130956000 |
| H | -4.635571000  | -7.918004000 | 7.605453000  |
| H | -6.153370000  | -8.186149000 | 8.526100000  |
| H | -5.808446000  | -6.569817000 | 7.813176000  |
| H | -6.489973000  | -4.364296000 | 14.763982000 |
| H | -5.220061000  | -5.615902000 | 14.716715000 |
| H | -4.908136000  | -4.010942000 | 14.019788000 |
| H | -3.661129000  | -3.377053000 | 5.143901000  |
| H | -2.574493000  | -4.710722000 | 4.664434000  |
| H | -2.410939000  | -3.116161000 | 3.899008000  |
| H | -8.120671000  | -4.664984000 | 1.454247000  |

**Coordinates of atoms for structure showed in figure 2g**

109

AgC36N12H56S4

|   |              |              |              |
|---|--------------|--------------|--------------|
| N | 3.105470000  | -6.552911000 | 8.207444000  |
| C | 2.584450000  | -7.604557000 | 8.893567000  |
| C | 1.481893000  | -8.306343000 | 8.426424000  |
| C | 0.905593000  | -7.887778000 | 7.200491000  |
| N | 1.417582000  | -6.838643000 | 6.513786000  |
| C | 2.482287000  | -6.250297000 | 7.062272000  |
| N | -0.164553000 | -8.533312000 | 6.665342000  |
| C | 3.267297000  | -7.962492000 | 10.181348000 |
| S | 3.224388000  | -4.859218000 | 6.214036000  |
| C | 2.183016000  | -4.719825000 | 4.720671000  |
| C | -0.861777000 | -8.097789000 | 5.461531000  |
| C | -1.894359000 | -6.989907000 | 5.711230000  |
| C | -2.525697000 | -6.480347000 | 4.412823000  |
| C | -3.552431000 | -5.365484000 | 4.637390000  |
| C | -4.108910000 | -4.787705000 | 3.332913000  |
| C | -5.132802000 | -3.673492000 | 3.583623000  |
| N | -5.628654000 | -3.055227000 | 2.355851000  |
| C | -5.040743000 | -2.017824000 | 1.727013000  |



|   |              |              |              |
|---|--------------|--------------|--------------|
| N | -3.954529000 | -1.450526000 | 2.312756000  |
| C | -3.407997000 | -0.422237000 | 1.687740000  |
| N | -3.807846000 | 0.124331000  | 0.514638000  |
| C | -4.900307000 | -0.443012000 | -0.085526000 |
| C | -5.544509000 | -1.516005000 | 0.495633000  |
| S | -1.986403000 | 0.386394000  | 2.391918000  |
| C | -1.712877000 | -0.571802000 | 3.922446000  |
| C | -5.344517000 | 0.153723000  | -1.384293000 |
| S | -8.411296000 | 8.547638000  | -7.540899000 |
| C | -6.971678000 | 7.455211000  | -7.279731000 |
| C | -7.644093000 | 10.039103000 | -8.166879000 |
| N | -6.315739000 | 10.070809000 | -8.290209000 |
| C | -5.796715000 | 11.223898000 | -8.775082000 |
| C | -6.636778000 | 12.314801000 | -9.113306000 |
| C | -8.003519000 | 12.157324000 | -8.929888000 |
| N | -8.531350000 | 11.001038000 | -8.447829000 |
| N | -4.449080000 | 11.291227000 | -8.942472000 |
| C | -8.980017000 | 13.250837000 | -9.251596000 |
| C | -3.520894000 | 10.248744000 | -8.522152000 |
| C | -3.138771000 | 10.323193000 | -7.037450000 |
| C | -2.241494000 | 9.159079000  | -6.608640000 |
| C | -1.845368000 | 9.215142000  | -5.129647000 |
| C | -1.018016000 | 8.006903000  | -4.681522000 |
| C | -0.621661000 | 8.093085000  | -3.202307000 |
| N | 0.127931000  | 6.928868000  | -2.735686000 |
| C | -0.425002000 | 5.809720000  | -2.226735000 |
| N | -1.771993000 | 5.784489000  | -2.054331000 |
| C | -2.286699000 | 4.683741000  | -1.534394000 |
| N | -1.615879000 | 3.566753000  | -1.164039000 |
| C | -0.257416000 | 3.581448000  | -1.336898000 |
| C | 0.372845000  | 4.690136000  | -1.863511000 |
| S | -4.042645000 | 4.571785000  | -1.261218000 |
| C | -4.633436000 | 6.192296000  | -1.861374000 |
| C | 0.489393000  | 2.348788000  | -0.933200000 |
| H | 1.454362000  | 4.703213000  | -1.998619000 |
| H | 0.005685000  | 8.979119000  | -3.024867000 |
| H | -1.519035000 | 8.184653000  | -2.575591000 |
| H | -5.722466000 | 6.167974000  | -1.732682000 |
| H | -4.200546000 | 6.999988000  | -1.262123000 |
| H | -4.380377000 | 6.317866000  | -2.919313000 |
| H | 1.567613000  | 2.460624000  | -1.098681000 |
| H | 0.320270000  | 2.129046000  | 0.132714000  |
| H | 0.135347000  | 1.480868000  | -1.511694000 |
| H | -0.107153000 | 7.925898000  | -5.298824000 |
| H | -1.595729000 | 7.081201000  | -4.840306000 |
| H | -2.758670000 | 9.279481000  | -4.511649000 |
| H | -1.278596000 | 10.143486000 | -4.938118000 |
| H | -1.328594000 | 9.144286000  | -7.230466000 |
| H | -2.764996000 | 8.206937000  | -6.808291000 |
| H | -4.063958000 | 10.317730000 | -6.438354000 |
| H | -2.631784000 | 11.282937000 | -6.838631000 |
| H | -2.622562000 | 10.332771000 | -9.152245000 |
| H | -3.989289000 | 9.276928000  | -8.734270000 |

|    |              |              |               |
|----|--------------|--------------|---------------|
| H  | -6.221629000 | 13.244725000 | -9.504721000  |
| H  | -7.381469000 | 6.521629000  | -6.873471000  |
| H  | -6.458325000 | 7.256700000  | -8.227055000  |
| H  | -6.272660000 | 7.902126000  | -6.563956000  |
| H  | -8.475422000 | 14.147314000 | -9.633721000  |
| H  | -9.704491000 | 12.901741000 | -10.002712000 |
| H  | -9.554981000 | 13.520517000 | -8.352867000  |
| H  | -6.415715000 | -1.965946000 | 0.019555000   |
| H  | -6.004601000 | -4.067739000 | 4.126121000   |
| H  | -4.683775000 | -2.881363000 | 4.198213000   |
| H  | -0.825096000 | -0.125821000 | 4.387297000   |
| H  | -2.576008000 | -0.477072000 | 4.589437000   |
| H  | -1.525606000 | -1.623192000 | 3.680298000   |
| H  | -6.229637000 | -0.358861000 | -1.779588000  |
| H  | -5.587259000 | 1.220087000  | -1.253869000  |
| H  | -4.538329000 | 0.085483000  | -2.131733000  |
| H  | -4.578738000 | -5.588230000 | 2.736622000   |
| H  | -3.283373000 | -4.379139000 | 2.726831000   |
| H  | -3.083620000 | -4.554003000 | 5.222231000   |
| H  | -4.381881000 | -5.750667000 | 5.256496000   |
| H  | -3.007210000 | -7.318536000 | 3.878260000   |
| H  | -1.727379000 | -6.108476000 | 3.745728000   |
| H  | -1.392514000 | -6.156742000 | 6.229731000   |
| H  | -2.678351000 | -7.366791000 | 6.390116000   |
| H  | -1.348272000 | -8.982454000 | 5.023816000   |
| H  | -0.106460000 | -7.742451000 | 4.745799000   |
| H  | 1.072343000  | -9.151718000 | 8.981320000   |
| H  | 2.583042000  | -3.863568000 | 4.162673000   |
| H  | 2.253620000  | -5.628115000 | 4.112104000   |
| H  | 1.138119000  | -4.535713000 | 4.994677000   |
| H  | 2.787357000  | -8.818883000 | 10.671811000  |
| H  | 4.324225000  | -8.204881000 | 9.994111000   |
| H  | 3.252461000  | -7.103130000 | 10.868593000  |
| Ag | -2.717532000 | 1.852749000  | -0.317477000  |
| H  | -6.409934000 | -3.500235000 | 1.881989000   |
| H  | 1.130634000  | 6.913549000  | -2.901439000  |
| H  | -0.586065000 | -9.269690000 | 7.222915000   |
| H  | -4.064495000 | 12.184354000 | -9.234589000  |

**Coordinates of atoms for structure showed in figure 2h**

109

AgC<sub>36</sub>N<sub>12</sub>H<sub>56</sub>S<sub>4</sub>

|   |              |              |              |
|---|--------------|--------------|--------------|
| N | 3.105470000  | -6.552911000 | 8.207444000  |
| C | 2.584450000  | -7.604557000 | 8.893567000  |
| C | 1.481893000  | -8.306343000 | 8.426424000  |
| C | 0.905593000  | -7.887778000 | 7.200491000  |
| N | 1.417582000  | -6.838643000 | 6.513786000  |
| C | 2.482287000  | -6.250297000 | 7.062272000  |
| N | -0.164553000 | -8.533312000 | 6.665342000  |
| C | 3.267297000  | -7.962492000 | 10.181348000 |
| S | 3.224388000  | -4.859218000 | 6.214036000  |
| C | 2.183016000  | -4.719825000 | 4.720671000  |

|   |              |              |              |
|---|--------------|--------------|--------------|
| C | -0.861777000 | -8.097789000 | 5.461531000  |
| C | -1.894359000 | -6.989907000 | 5.711230000  |
| C | -2.525697000 | -6.480347000 | 4.412823000  |
| C | -3.552431000 | -5.365484000 | 4.637390000  |
| C | -4.108910000 | -4.787705000 | 3.332913000  |
| C | -5.132802000 | -3.673492000 | 3.583623000  |
| N | -5.628654000 | -3.055227000 | 2.355851000  |
| C | -5.040743000 | -2.017824000 | 1.727013000  |
| N | -3.954529000 | -1.450526000 | 2.312756000  |
| C | -3.407997000 | -0.422237000 | 1.687740000  |
| N | -3.807846000 | 0.124331000  | 0.514638000  |
| C | -4.900307000 | -0.443012000 | -0.085526000 |
| C | -5.544509000 | -1.516005000 | 0.495633000  |
| S | -1.986403000 | 0.386394000  | 2.391918000  |
| C | -1.712877000 | -0.571802000 | 3.922446000  |
| C | -5.344517000 | 0.153723000  | -1.384293000 |
| S | -8.411296000 | 8.547638000  | -7.540899000 |
| C | -6.971678000 | 7.455211000  | -7.279731000 |
| C | -7.644093000 | 10.039103000 | -8.166879000 |
| N | -6.315739000 | 10.070809000 | -8.290209000 |
| C | -5.796715000 | 11.223898000 | -8.775082000 |
| C | -6.636778000 | 12.314801000 | -9.113306000 |
| C | -8.003519000 | 12.157324000 | -8.929888000 |
| N | -8.531350000 | 11.001038000 | -8.447829000 |
| N | -4.449080000 | 11.291227000 | -8.942472000 |
| C | -8.980017000 | 13.250837000 | -9.251596000 |
| C | -3.520894000 | 10.248744000 | -8.522152000 |
| C | -3.138771000 | 10.323193000 | -7.037450000 |
| C | -2.241494000 | 9.159079000  | -6.608640000 |
| C | -1.845368000 | 9.215142000  | -5.129647000 |
| C | -1.018016000 | 8.006903000  | -4.681522000 |
| C | -0.621661000 | 8.093085000  | -3.202307000 |
| N | 0.127931000  | 6.928868000  | -2.735686000 |
| C | -0.425002000 | 5.809720000  | -2.226735000 |
| N | -1.771993000 | 5.784489000  | -2.054331000 |
| C | -2.286699000 | 4.683741000  | -1.534394000 |
| N | -1.615879000 | 3.566753000  | -1.164039000 |
| C | -0.257416000 | 3.581448000  | -1.336898000 |
| C | 0.372845000  | 4.690136000  | -1.863511000 |
| S | -4.042645000 | 4.571785000  | -1.261218000 |
| C | -4.633436000 | 6.192296000  | -1.861374000 |
| C | 0.489393000  | 2.348788000  | -0.933200000 |
| H | 1.454362000  | 4.703213000  | -1.998619000 |
| H | 0.005685000  | 8.979119000  | -3.024867000 |
| H | -1.519035000 | 8.184653000  | -2.575591000 |
| H | -5.722466000 | 6.167974000  | -1.732682000 |
| H | -4.200546000 | 6.999988000  | -1.262123000 |
| H | -4.380377000 | 6.317866000  | -2.919313000 |
| H | 1.567613000  | 2.460624000  | -1.098681000 |
| H | 0.320270000  | 2.129046000  | 0.132714000  |
| H | 0.135347000  | 1.480868000  | -1.511694000 |
| H | -0.107153000 | 7.925898000  | -5.298824000 |
| H | -1.595729000 | 7.081201000  | -4.840306000 |

|    |              |              |               |
|----|--------------|--------------|---------------|
| H  | -2.758670000 | 9.279481000  | -4.511649000  |
| H  | -1.278596000 | 10.143486000 | -4.938118000  |
| H  | -1.328594000 | 9.144286000  | -7.230466000  |
| H  | -2.764996000 | 8.206937000  | -6.808291000  |
| H  | -4.063958000 | 10.317730000 | -6.438354000  |
| H  | -2.631784000 | 11.282937000 | -6.838631000  |
| H  | -2.622562000 | 10.332771000 | -9.152245000  |
| H  | -3.989289000 | 9.276928000  | -8.734270000  |
| H  | -6.221629000 | 13.244725000 | -9.504721000  |
| H  | -7.381469000 | 6.521629000  | -6.873471000  |
| H  | -6.458325000 | 7.256700000  | -8.227055000  |
| H  | -6.272660000 | 7.902126000  | -6.563956000  |
| H  | -8.475422000 | 14.147314000 | -9.633721000  |
| H  | -9.704491000 | 12.901741000 | -10.002712000 |
| H  | -9.554981000 | 13.520517000 | -8.352867000  |
| H  | -6.415715000 | -1.965946000 | 0.019555000   |
| H  | -6.004601000 | -4.067739000 | 4.126121000   |
| H  | -4.683775000 | -2.881363000 | 4.198213000   |
| H  | -0.825096000 | -0.125821000 | 4.387297000   |
| H  | -2.576008000 | -0.477072000 | 4.589437000   |
| H  | -1.525606000 | -1.623192000 | 3.680298000   |
| H  | -6.229637000 | -0.358861000 | -1.779588000  |
| H  | -5.587259000 | 1.220087000  | -1.253869000  |
| H  | -4.538329000 | 0.085483000  | -2.131733000  |
| H  | -4.578738000 | -5.588230000 | 2.736622000   |
| H  | -3.283373000 | -4.379139000 | 2.726831000   |
| H  | -3.083620000 | -4.554003000 | 5.222231000   |
| H  | -4.381881000 | -5.750667000 | 5.256496000   |
| H  | -3.007210000 | -7.318536000 | 3.878260000   |
| H  | -1.727379000 | -6.108476000 | 3.745728000   |
| H  | -1.392514000 | -6.156742000 | 6.229731000   |
| H  | -2.678351000 | -7.366791000 | 6.390116000   |
| H  | -1.348272000 | -8.982454000 | 5.023816000   |
| H  | -0.106460000 | -7.742451000 | 4.745799000   |
| H  | 1.072343000  | -9.151718000 | 8.981320000   |
| H  | 2.583042000  | -3.863568000 | 4.162673000   |
| H  | 2.253620000  | -5.628115000 | 4.112104000   |
| H  | 1.138119000  | -4.535713000 | 4.994677000   |
| H  | 2.787357000  | -8.818883000 | 10.671811000  |
| H  | 4.324225000  | -8.204881000 | 9.994111000   |
| H  | 3.252461000  | -7.103130000 | 10.868593000  |
| Ag | -2.717532000 | 1.852749000  | -0.317477000  |
| H  | -6.409934000 | -3.500235000 | 1.881989000   |
| H  | 1.130634000  | 6.913549000  | -2.901439000  |
| H  | -0.586065000 | -9.269690000 | 7.222915000   |
| H  | -4.064495000 | 12.184354000 | -9.234589000  |

**The optimized structures of compound L4, its complexes and coordinates for geometry-optimized structures**

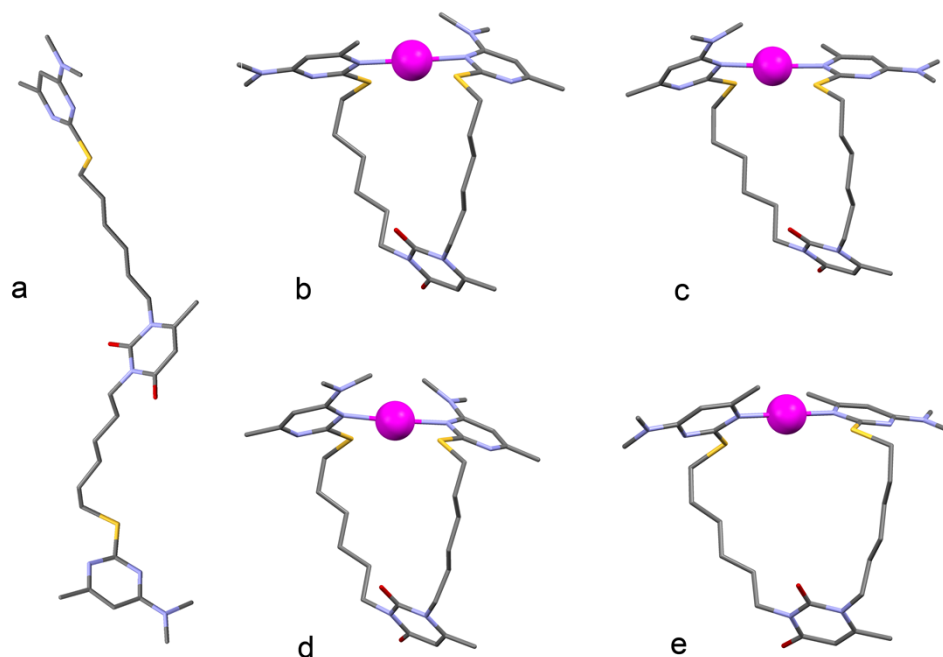

**Fig. 3** The optimized structures of (a) compound L4 and its complexes:  $[\text{AgL4}]^+$  with the (b) N1- $\text{Ag}^+$ -N3, (c) N3- $\text{Ag}^+$ -N1, (d) N3- $\text{Ag}^+$ -N3 and (e) N1- $\text{Ag}^+$ -N1 coordination modes.

**Coordinates of atoms for structure showed in figure 3a**

91  
C31N8H48S2O2

|   |               |              |              |
|---|---------------|--------------|--------------|
| N | -11.633207000 | -1.538340000 | 4.883985000  |
| C | -10.428857000 | -1.979896000 | 5.254444000  |
| N | -10.123060000 | -2.837106000 | 6.233675000  |
| C | -11.159128000 | -3.327043000 | 6.957020000  |
| C | -12.491041000 | -2.924025000 | 6.653856000  |
| C | -12.674104000 | -2.029279000 | 5.610049000  |
| S | -8.974795000  | -1.397104000 | 4.383625000  |
| C | -9.693786000  | -0.266661000 | 3.113230000  |
| C | -8.631152000  | 0.695354000  | 2.584565000  |
| C | -7.468236000  | 0.027677000  | 1.842543000  |
| C | -6.488801000  | 1.039862000  | 1.241302000  |
| C | -5.306491000  | 0.383344000  | 0.522221000  |
| C | -4.376693000  | 1.429265000  | -0.099482000 |
| N | -3.217738000  | 0.842029000  | -0.800758000 |
| C | -3.443858000  | 0.453722000  | -2.133276000 |
| N | -2.365877000  | -0.115858000 | -2.803516000 |
| C | -1.083660000  | -0.329646000 | -2.234353000 |
| C | -0.964844000  | 0.073532000  | -0.858901000 |
| C | -1.999387000  | 0.643209000  | -0.173831000 |
| O | -4.541401000  | 0.617282000  | -2.670319000 |
| C | -1.840374000  | 1.084396000  | 1.250049000  |
| O | -0.172371000  | -0.830499000 | -2.907772000 |
| C | -2.580036000  | -0.504329000 | -4.209077000 |

|   |               |              |               |
|---|---------------|--------------|---------------|
| C | -2.422218000  | 0.668019000  | -5.181344000  |
| C | -2.564558000  | 0.223872000  | -6.640706000  |
| C | -2.547297000  | 1.397134000  | -7.625636000  |
| C | -2.577071000  | 0.956829000  | -9.091588000  |
| C | -2.678269000  | 2.102482000  | -10.097530000 |
| S | -1.264533000  | 3.283293000  | -10.075009000 |
| C | -0.069432000  | 2.493504000  | -11.153649000 |
| N | -0.401712000  | 1.368533000  | -11.789537000 |
| C | 0.563617000   | 0.854616000  | -12.598669000 |
| C | 1.802133000   | 1.461502000  | -12.748843000 |
| C | 2.041364000   | 2.660460000  | -12.020722000 |
| N | 1.082965000   | 3.171707000  | -11.209909000 |
| C | 0.213235000   | -0.411978000 | -13.323944000 |
| N | 3.215910000   | 3.340733000  | -12.095770000 |
| C | 3.395162000   | 4.554124000  | -11.300316000 |
| N | -10.885022000 | -4.199866000 | 7.964842000   |
| C | -9.525706000  | -4.638303000 | 8.258984000   |
| C | -14.040018000 | -1.547110000 | 5.215133000   |
| H | -0.003351000  | -0.080632000 | -0.374275000  |
| H | -0.850542000  | 0.786844000  | 1.613974000   |
| H | -1.923430000  | 2.178322000  | 1.341592000   |
| H | -2.600814000  | 0.637118000  | 1.906516000   |
| H | -3.995906000  | 2.117227000  | 0.664572000   |
| H | -4.926997000  | 2.022811000  | -0.840262000  |
| H | -1.838146000  | -1.283232000 | -4.424488000  |
| H | -3.588133000  | -0.932360000 | -4.283536000  |
| H | -5.675434000  | -0.282241000 | -0.274059000  |
| H | -4.741438000  | -0.244905000 | 1.231374000   |
| H | -3.180499000  | 1.433142000  | -4.949141000  |
| H | -1.433069000  | 1.130976000  | -5.030811000  |
| H | -6.111005000  | 1.700691000  | 2.042062000   |
| H | -7.029974000  | 1.691569000  | 0.532565000   |
| H | -1.748869000  | -0.477811000 | -6.889711000  |
| H | -3.506343000  | -0.340459000 | -6.763891000  |
| H | -7.869902000  | -0.615706000 | 1.039975000   |
| H | -6.922103000  | -0.641034000 | 2.530604000   |
| H | -3.413356000  | 2.052595000  | -7.422586000  |
| H | -1.647243000  | 2.010687000  | -7.450340000  |
| H | -1.685975000  | 0.351308000  | -9.324064000  |
| H | -3.451183000  | 0.301058000  | -9.258097000  |
| H | -8.240603000  | 1.305042000  | 3.416911000   |
| H | -9.141845000  | 1.394122000  | 1.899035000   |
| H | -2.748334000  | 1.723118000  | -11.124875000 |
| H | -3.556420000  | 2.733553000  | -9.893075000  |
| H | -10.519000000 | 0.268634000  | 3.598108000   |
| H | -10.112918000 | -0.879821000 | 2.302676000   |
| H | 2.553364000   | 1.022164000  | -13.402063000 |
| H | -13.348166000 | -3.298235000 | 7.209653000   |
| H | -14.090722000 | -0.450442000 | 5.292413000   |
| H | -14.242953000 | -1.803933000 | 4.164355000   |
| H | -14.824245000 | -1.984783000 | 5.845983000   |
| H | 1.040709000   | -0.762347000 | -13.954149000 |
| H | -0.045218000  | -1.201925000 | -12.602548000 |

|   |               |              |               |
|---|---------------|--------------|---------------|
| H | -0.673640000  | -0.253185000 | -13.956048000 |
| C | -11.962791000 | -4.771173000 | 8.762755000   |
| C | 4.303269000   | 2.843950000  | -12.929868000 |
| H | -8.831098000  | -4.108805000 | 7.600632000   |
| H | -9.273495000  | -4.418149000 | 9.308149000   |
| H | -9.425120000  | -5.723327000 | 8.093478000   |
| H | 4.383880000   | 4.970236000  | -11.521841000 |
| H | 2.626296000   | 5.302176000  | -11.541549000 |
| H | 3.327635000   | 4.340278000  | -10.222791000 |
| H | -11.522029000 | -5.424503000 | 9.523760000   |
| H | -12.544379000 | -3.989796000 | 9.277494000   |
| H | -12.651111000 | -5.374531000 | 8.148310000   |
| H | 5.144875000   | 3.540998000  | -12.863995000 |
| H | 4.651979000   | 1.851693000  | -12.598476000 |
| H | 4.001100000   | 2.770946000  | -13.987232000 |

**Coordinates of atoms for structure showed in figure 3b**

92

AgC<sub>31</sub>N<sub>8</sub>H<sub>48</sub>S<sub>2</sub>O<sub>2</sub>

|    |              |              |              |
|----|--------------|--------------|--------------|
| N  | -8.762271000 | -0.114218000 | 0.076976000  |
| C  | -8.576327000 | -0.305891000 | -1.213457000 |
| N  | -8.733067000 | 0.597057000  | -2.214578000 |
| C  | -9.190828000 | 1.837055000  | -1.860508000 |
| C  | -9.354257000 | 2.142084000  | -0.480306000 |
| C  | -9.130953000 | 1.145323000  | 0.451565000  |
| S  | -8.097669000 | -1.918699000 | -1.828789000 |
| Ag | -7.638438000 | -0.000890000 | -4.108366000 |
| N  | -6.577028000 | -0.443032000 | -6.013819000 |
| C  | -5.783041000 | 0.503147000  | -6.574881000 |
| N  | -5.072045000 | 0.388102000  | -7.677972000 |
| C  | -5.123864000 | -0.802132000 | -8.339947000 |
| C  | -5.948594000 | -1.852315000 | -7.842716000 |
| C  | -6.660012000 | -1.634558000 | -6.678116000 |
| S  | -5.790574000 | 2.039376000  | -5.663901000 |
| C  | -4.508173000 | 3.048227000  | -6.531569000 |
| C  | -3.072731000 | 2.738080000  | -6.114057000 |
| C  | -2.776089000 | 3.019527000  | -4.639599000 |
| C  | -1.376334000 | 2.581723000  | -4.194259000 |
| C  | -1.230096000 | 2.598672000  | -2.670185000 |
| C  | 0.097790000  | 2.004170000  | -2.179172000 |
| N  | 0.002850000  | 1.564023000  | -0.775984000 |
| C  | -0.636874000 | 0.348214000  | -0.560534000 |
| N  | -0.837117000 | -0.029827000 | 0.777466000  |
| C  | -0.397963000 | 0.751327000  | 1.833129000  |
| C  | 0.252202000  | 1.926885000  | 1.586048000  |
| C  | 0.467087000  | 2.423801000  | 0.252093000  |
| O  | -1.026309000 | -0.361917000 | -1.490988000 |
| C  | -1.661161000 | -1.241802000 | 0.961557000  |
| C  | -3.158856000 | -0.946838000 | 0.808286000  |
| C  | -3.995332000 | -2.214831000 | 0.616760000  |
| C  | -5.470303000 | -1.907454000 | 0.336045000  |
| C  | -6.285644000 | -3.153765000 | -0.012179000 |

|   |               |              |               |
|---|---------------|--------------|---------------|
| C | -7.764121000  | -2.895087000 | -0.291922000  |
| C | -0.636964000  | 0.268355000  | 3.231489000   |
| O | 1.001006000   | 3.505562000  | -0.027398000  |
| C | -7.546359000  | -2.682520000 | -6.080359000  |
| N | -4.382729000  | -0.941565000 | -9.460574000  |
| C | -3.552646000  | 0.138484000  | -9.987989000  |
| N | -9.484267000  | 2.738082000  | -2.827802000  |
| C | -9.652209000  | 2.357305000  | -4.227160000  |
| C | -9.305402000  | 1.373977000  | 1.920705000   |
| H | 0.606638000   | 2.541619000  | 2.410459000   |
| H | -0.258165000  | 1.010427000  | 3.943106000   |
| H | -1.707153000  | 0.111408000  | 3.432429000   |
| H | -0.119128000  | -0.684505000 | 3.420025000   |
| H | -1.343374000  | -1.960117000 | 0.195324000   |
| H | -1.430098000  | -1.671618000 | 1.942107000   |
| H | 0.911202000   | 2.737398000  | -2.223406000  |
| H | 0.367304000   | 1.125500000  | -2.779261000  |
| H | -3.520968000  | -0.378049000 | 1.681314000   |
| H | -3.293633000  | -0.301328000 | -0.073900000  |
| H | -2.053058000  | 2.002170000  | -2.244923000  |
| H | -1.341203000  | 3.623839000  | -2.280916000  |
| H | -3.579040000  | -2.789310000 | -0.229706000  |
| H | -3.912032000  | -2.865330000 | 1.504974000   |
| H | -0.608712000  | 3.219176000  | -4.665868000  |
| H | -1.191976000  | 1.553246000  | -4.552416000  |
| H | -5.921588000  | -1.404975000 | 1.208643000   |
| H | -5.531970000  | -1.190304000 | -0.501120000  |
| H | -3.519936000  | 2.482851000  | -4.025123000  |
| H | -2.918434000  | 4.094310000  | -4.430444000  |
| H | -2.410336000  | 3.345895000  | -6.755627000  |
| H | -2.849638000  | 1.684383000  | -6.347456000  |
| H | -5.827475000  | -3.671321000 | -0.871815000  |
| H | -6.247127000  | -3.867454000 | 0.830045000   |
| H | -4.788908000  | 4.082980000  | -6.285647000  |
| H | -4.669520000  | 2.888357000  | -7.605212000  |
| H | -8.313483000  | -3.834486000 | -0.436324000  |
| H | -8.246032000  | -2.317359000 | 0.510466000   |
| H | -6.028623000  | -2.810335000 | -8.350212000  |
| H | -9.692757000  | 3.123693000  | -0.159052000  |
| H | -10.056011000 | 0.677984000  | 2.324456000   |
| H | -8.361380000  | 1.166164000  | 2.447145000   |
| H | -9.616339000  | 2.402810000  | 2.138954000   |
| H | -7.559691000  | -3.592921000 | -6.691434000  |
| H | -7.199363000  | -2.945745000 | -5.068855000  |
| H | -8.577714000  | -2.306830000 | -5.989699000  |
| C | -9.791440000  | 4.126218000  | -2.479987000  |
| C | -4.416851000  | -2.187829000 | -10.223237000 |
| H | -8.720127000  | 2.474860000  | -4.807496000  |
| H | -10.010131000 | 1.322578000  | -4.304136000  |
| H | -10.412298000 | 3.009874000  | -4.675281000  |
| H | -2.511722000  | -0.204482000 | -10.083598000 |
| H | -3.916444000  | 0.446542000  | -10.980457000 |
| H | -3.593490000  | 0.991994000  | -9.306486000  |



|   |               |              |               |
|---|---------------|--------------|---------------|
| H | -9.684991000  | 4.739599000  | -3.381451000  |
| H | -10.820458000 | 4.235483000  | -2.099700000  |
| H | -9.086235000  | 4.505563000  | -1.729522000  |
| H | -3.724439000  | -2.095743000 | -11.066334000 |
| H | -4.098001000  | -3.042224000 | -9.607348000  |
| H | -5.423593000  | -2.388475000 | -10.621787000 |

**Coordinates of atoms for structure showed in figure 3c**

92

AgC31N8H48S2O2

|    |              |              |              |
|----|--------------|--------------|--------------|
| N  | -8.102595000 | 0.528944000  | -2.197800000 |
| C  | -8.062750000 | -0.438283000 | -1.248587000 |
| N  | -8.423866000 | -0.322962000 | 0.012824000  |
| C  | -8.881846000 | 0.889799000  | 0.432206000  |
| C  | -8.986851000 | 1.963615000  | -0.497848000 |
| C  | -8.588045000 | 1.744478000  | -1.802564000 |
| S  | -7.477874000 | -2.003597000 | -1.887353000 |
| C  | -7.356238000 | -3.080909000 | -0.388694000 |
| C  | -5.922442000 | -3.318687000 | 0.084056000  |
| C  | -5.206078000 | -2.065267000 | 0.588856000  |
| C  | -3.731881000 | -2.300045000 | 0.936176000  |
| C  | -2.987973000 | -0.986857000 | 1.195504000  |
| C  | -1.470025000 | -1.167738000 | 1.340340000  |
| N  | -0.744455000 | 0.090796000  | 1.072505000  |
| C  | -0.609049000 | 0.408950000  | -0.289656000 |
| N  | -0.083750000 | 1.661064000  | -0.588050000 |
| C  | 0.323049000  | 2.615365000  | 0.379496000  |
| C  | 0.184031000  | 2.177413000  | 1.743947000  |
| C  | -0.353178000 | 0.965189000  | 2.071961000  |
| O  | -0.956687000 | -0.383724000 | -1.168465000 |
| C  | -0.517878000 | 0.542089000  | 3.500129000  |
| O  | 0.750974000  | 3.722706000  | 0.027412000  |
| C  | -0.042470000 | 2.024861000  | -2.015440000 |
| C  | -1.412265000 | 2.494713000  | -2.522274000 |
| C  | -1.511720000 | 2.495795000  | -4.049872000 |
| C  | -2.907047000 | 2.891051000  | -4.545794000 |
| C  | -3.096944000 | 2.677596000  | -6.048820000 |
| C  | -4.467779000 | 3.079458000  | -6.582368000 |
| S  | -5.893015000 | 2.119407000  | -5.899792000 |
| Ag | -7.385115000 | 0.114514000  | -4.267052000 |
| N  | -6.743365000 | -0.311852000 | -6.405216000 |
| C  | -5.867110000 | 0.616924000  | -6.869085000 |
| N  | -5.070417000 | 0.521490000  | -7.915417000 |
| C  | -5.119516000 | -0.658465000 | -8.599790000 |
| C  | -5.994820000 | -1.667870000 | -8.243556000 |
| C  | -6.861133000 | -1.463830000 | -7.133303000 |
| C  | -4.191411000 | -0.784429000 | -9.767329000 |
| N  | -7.799569000 | -2.377676000 | -6.788036000 |
| C  | -8.879664000 | -2.071767000 | -5.855844000 |
| N  | -9.227685000 | 1.029079000  | 1.730800000  |
| C  | -9.179138000 | -0.082886000 | 2.676581000  |
| C  | -8.661593000 | 2.817068000  | -2.844039000 |

|   |               |              |               |
|---|---------------|--------------|---------------|
| H | 0.501563000   | 2.866149000  | 2.523693000   |
| H | -0.185183000  | 1.350521000  | 4.160679000   |
| H | -1.566461000  | 0.310034000  | 3.738976000   |
| H | 0.081219000   | -0.353794000 | 3.723879000   |
| H | -1.111069000  | -1.900961000 | 0.607298000   |
| H | -1.190856000  | -1.524048000 | 2.337428000   |
| H | 0.712472000   | 2.813380000  | -2.115696000  |
| H | 0.284698000   | 1.135749000  | -2.569786000  |
| H | -3.395416000  | -0.481686000 | 2.087346000   |
| H | -3.169342000  | -0.317447000 | 0.339945000   |
| H | -2.184189000  | 1.816222000  | -2.124759000  |
| H | -1.625231000  | 3.499450000  | -2.121771000  |
| H | -3.243714000  | -2.817840000 | 0.091733000   |
| H | -3.647617000  | -2.973427000 | 1.806637000   |
| H | -0.755733000  | 3.174151000  | -4.482203000  |
| H | -1.269992000  | 1.483834000  | -4.420774000  |
| H | -5.741369000  | -1.658568000 | 1.463957000   |
| H | -5.259536000  | -1.289300000 | -0.194564000  |
| H | -3.661228000  | 2.295989000  | -4.001642000  |
| H | -3.104509000  | 3.948110000  | -4.294219000  |
| H | -2.354372000  | 3.277442000  | -6.604888000  |
| H | -2.900483000  | 1.625206000  | -6.309798000  |
| H | -5.337729000  | -3.775222000 | -0.732206000  |
| H | -5.971507000  | -4.075065000 | 0.887196000   |
| H | -4.717678000  | 4.119024000  | -6.323820000  |
| H | -4.531052000  | 2.961673000  | -7.671680000  |
| H | -7.843738000  | -4.021424000 | -0.676696000  |
| H | -7.971025000  | -2.581157000 | 0.373052000   |
| H | -6.041275000  | -2.581488000 | -8.830395000  |
| H | -9.371750000  | 2.938807000  | -0.210754000  |
| H | -7.657556000  | 3.038802000  | -3.238172000  |
| H | -9.284119000  | 2.488284000  | -3.691012000  |
| H | -9.087098000  | 3.742211000  | -2.437310000  |
| H | -4.298252000  | -1.752629000 | -10.271335000 |
| H | -4.385451000  | 0.021165000  | -10.491465000 |
| H | -3.149545000  | -0.667806000 | -9.432213000  |
| C | -9.750486000  | 2.299985000  | 2.228036000   |
| C | -7.826936000  | -3.688918000 | -7.438208000  |
| H | -10.194913000 | -0.336244000 | 3.018244000   |
| H | -8.734243000  | -0.954294000 | 2.189824000   |
| H | -8.572505000  | 0.198789000  | 3.549814000   |
| H | -9.743929000  | -2.697944000 | -6.108192000  |
| H | -8.602892000  | -2.285324000 | -4.807842000  |
| H | -9.186628000  | -1.021618000 | -5.951546000  |
| H | -8.454470000  | -4.358248000 | -6.840253000  |
| H | -8.244354000  | -3.632788000 | -8.456936000  |
| H | -6.819744000  | -4.123471000 | -7.484983000  |
| H | -9.882441000  | 2.218460000  | 3.311974000   |
| H | -9.049680000  | 3.123900000  | 2.028561000   |
| H | -10.725928000 | 2.540995000  | 1.776415000   |

**Coordinates of atoms for structure showed in figure 3d**

## AgC31N8H48S2O2

|    |              |              |              |
|----|--------------|--------------|--------------|
| N  | -8.496120000 | -0.185398000 | -0.054280000 |
| C  | -8.335858000 | -0.346108000 | -1.352410000 |
| N  | -8.535426000 | 0.572149000  | -2.331330000 |
| C  | -8.996871000 | 1.799290000  | -1.939114000 |
| C  | -9.126453000 | 2.074469000  | -0.549325000 |
| C  | -8.874558000 | 1.059869000  | 0.355633000  |
| S  | -7.817644000 | -1.931099000 | -2.006446000 |
| C  | -7.548016000 | -2.970519000 | -0.497726000 |
| C  | -6.083164000 | -3.210608000 | -0.141578000 |
| C  | -5.326866000 | -1.963362000 | 0.316955000  |
| C  | -3.858152000 | -2.236091000 | 0.658509000  |
| C  | -3.083599000 | -0.946184000 | 0.941001000  |
| C  | -1.577147000 | -1.174236000 | 1.126638000  |
| N  | -0.811999000 | 0.076281000  | 0.945334000  |
| C  | -0.627904000 | 0.459417000  | -0.393656000 |
| N  | -0.077155000 | 1.717018000  | -0.612646000 |
| C  | 0.324109000  | 2.610573000  | 0.413247000  |
| C  | 0.142314000  | 2.103955000  | 1.748686000  |
| C  | -0.430399000 | 0.889331000  | 1.998969000  |
| O  | -0.959940000 | -0.281791000 | -1.322058000 |
| C  | -0.644297000 | 0.397707000  | 3.398346000  |
| O  | 0.781170000  | 3.726332000  | 0.131163000  |
| C  | -0.010773000 | 2.155837000  | -2.017716000 |
| C  | -1.379661000 | 2.634783000  | -2.522406000 |
| C  | -1.495636000 | 2.619284000  | -4.048565000 |
| C  | -2.909500000 | 2.965518000  | -4.528225000 |
| C  | -3.119813000 | 2.716760000  | -6.022681000 |
| C  | -4.524882000 | 3.026420000  | -6.526609000 |
| S  | -5.870233000 | 1.979753000  | -5.805399000 |
| Ag | -7.547040000 | 0.002375000  | -4.310539000 |
| N  | -6.678448000 | -0.454164000 | -6.376059000 |
| C  | -5.790575000 | 0.487604000  | -6.787789000 |
| N  | -4.936340000 | 0.407702000  | -7.789260000 |
| C  | -4.926559000 | -0.771845000 | -8.475530000 |
| C  | -5.794326000 | -1.801079000 | -8.160339000 |
| C  | -6.725518000 | -1.612940000 | -7.101187000 |
| C  | -3.940065000 | -0.876543000 | -9.596322000 |
| N  | -7.660309000 | -2.548967000 | -6.806549000 |
| C  | -8.828185000 | -2.258027000 | -5.982088000 |
| N  | -9.331252000 | 2.716344000  | -2.878637000 |
| C  | -9.584264000 | 2.356939000  | -4.270680000 |
| C  | -9.024399000 | 1.253168000  | 1.832499000  |
| H  | 0.453667000  | 2.743697000  | 2.571471000  |
| H  | -0.308577000 | 1.161547000  | 4.108556000  |
| H  | -1.704712000 | 0.182846000  | 3.597948000  |
| H  | -0.075318000 | -0.524805000 | 3.590123000  |
| H  | -1.211303000 | -1.881806000 | 0.372059000  |
| H  | -1.343402000 | -1.584548000 | 2.114669000  |
| H  | 0.738099000  | 2.954938000  | -2.061095000 |
| H  | 0.336134000  | 1.300328000  | -2.611647000 |
| H  | -3.498654000 | -0.435430000 | 1.826211000  |

|   |               |              |               |
|---|---------------|--------------|---------------|
| H | -3.222622000  | -0.266420000 | 0.085655000   |
| H | -2.153750000  | 1.965286000  | -2.114566000  |
| H | -1.584720000  | 3.643647000  | -2.128493000  |
| H | -3.380182000  | -2.756524000 | -0.190255000  |
| H | -3.793742000  | -2.921586000 | 1.521434000   |
| H | -0.764988000  | 3.313585000  | -4.498500000  |
| H | -1.230733000  | 1.610071000  | -4.410873000  |
| H | -5.840026000  | -1.522377000 | 1.188330000   |
| H | -5.369547000  | -1.203784000 | -0.483181000  |
| H | -3.635076000  | 2.356922000  | -3.960352000  |
| H | -3.136166000  | 4.020230000  | -4.292038000  |
| H | -2.428281000  | 3.350527000  | -6.606266000  |
| H | -2.868318000  | 1.673911000  | -6.273239000  |
| H | -5.561100000  | -3.671447000 | -0.997000000  |
| H | -6.076823000  | -3.966045000 | 0.664300000   |
| H | -4.836039000  | 4.049295000  | -6.267995000  |
| H | -4.606142000  | 2.895717000  | -7.613161000  |
| H | -8.066553000  | -3.912501000 | -0.719068000  |
| H | -8.087921000  | -2.440657000 | 0.300501000   |
| H | -5.791070000  | -2.715580000 | -8.747622000  |
| H | -9.470386000  | 3.044415000  | -0.199602000  |
| H | -9.757604000  | 0.537787000  | 2.234376000   |
| H | -8.067780000  | 1.046902000  | 2.336321000   |
| H | -9.345096000  | 2.272336000  | 2.079944000   |
| H | -4.002202000  | -1.845952000 | -10.105462000 |
| H | -4.114629000  | -0.073873000 | -10.328596000 |
| H | -2.918539000  | -0.739289000 | -9.210286000  |
| C | -9.634739000  | 4.095810000  | -2.496039000  |
| C | -7.612340000  | -3.868628000 | -7.437909000  |
| H | -8.702384000  | 2.521027000  | -4.913321000  |
| H | -9.909571000  | 1.311060000  | -4.342537000  |
| H | -10.400133000 | 2.986599000  | -4.649261000  |
| H | -9.665330000  | -2.873707000 | -6.334528000  |
| H | -8.660862000  | -2.493230000 | -4.916692000  |
| H | -9.122872000  | -1.205486000 | -6.090897000  |
| H | -8.229051000  | -4.556021000 | -6.848495000  |
| H | -8.000105000  | -3.844994000 | -8.469798000  |
| H | -6.587115000  | -4.259938000 | -7.445911000  |
| H | -9.544802000  | 4.728343000  | -3.386386000  |
| H | -10.657244000 | 4.196142000  | -2.095637000  |
| H | -8.916523000  | 4.460022000  | -1.750917000  |

### Coordinates of atoms for structure showed in figure 3e

92

AgC<sub>31</sub>N<sub>8</sub>H<sub>48</sub>S<sub>2</sub>O<sub>2</sub>

|    |              |              |               |
|----|--------------|--------------|---------------|
| N  | -8.401754000 | 0.496290000  | -2.117250000  |
| C  | -8.327481000 | -0.417111000 | -1.118377000  |
| N  | -8.707094000 | -0.248974000 | 0.132876000   |
| C  | -9.229320000 | 0.961512000  | 0.474193000   |
| C  | -9.379292000 | 1.977409000  | -0.511772000  |
| C  | -8.952075000 | 1.706900000  | -1.797877000  |
| S  | -7.673881000 | -1.988028000 | -1.666236000  |
| C  | -7.500524000 | -2.959581000 | -0.100808000  |
| C  | -6.047798000 | -3.216028000 | 0.298909000   |
| C  | -5.259838000 | -1.959809000 | 0.674419000   |
| C  | -3.781299000 | -2.236472000 | 0.968942000   |
| C  | -2.965904000 | -0.948546000 | 1.115763000   |
| C  | -1.458357000 | -1.207950000 | 1.237761000   |
| N  | -0.664683000 | 0.005215000  | 0.954444000   |
| C  | -0.515273000 | 0.304813000  | -0.410285000  |
| N  | 0.100372000  | 1.512794000  | -0.719315000  |
| C  | 0.580986000  | 2.440873000  | 0.239646000   |
| C  | 0.414477000  | 2.024429000  | 1.607633000   |
| C  | -0.206456000 | 0.855887000  | 1.946125000   |
| O  | -0.925269000 | -0.465224000 | -1.282302000  |
| C  | -0.392982000 | 0.455205000  | 3.378100000   |
| O  | 1.089159000  | 3.510601000  | -0.122128000  |
| C  | 0.156324000  | 1.866480000  | -2.148945000  |
| C  | -1.178953000 | 2.441531000  | -2.639149000  |
| C  | -1.321819000 | 2.420137000  | -4.163517000  |
| C  | -2.708395000 | 2.890386000  | -4.616550000  |
| C  | -2.996486000 | 2.632098000  | -6.097048000  |
| C  | -4.404700000 | 3.024507000  | -6.537385000  |
| S  | -5.754176000 | 2.084984000  | -5.694476000  |
| C  | -5.866956000 | 0.590641000  | -6.664914000  |
| N  | -6.682680000 | -0.338086000 | -6.106381000  |
| C  | -6.874139000 | -1.489271000 | -6.818057000  |
| C  | -6.237621000 | -1.690813000 | -8.028176000  |
| C  | -5.378083000 | -0.665556000 | -8.515855000  |
| N  | -5.219407000 | 0.488280000  | -7.808928000  |
| Ag | -7.546705000 | 0.044973000  | -4.106589000  |
| C  | -7.795466000 | -2.507167000 | -6.221117000  |
| N  | -4.696888000 | -0.772859000 | -9.676060000  |
| C  | -3.839227000 | 0.329069000  | -10.119192000 |
| N  | -9.592562000 | 1.133233000  | 1.762752000   |
| C  | -9.420516000 | 0.036469000  | 2.718042000   |
| C  | -9.065583000 | 2.711005000  | -2.902310000  |
| H  | 0.783236000  | 2.694114000  | 2.381403000   |
| H  | -0.006854000 | 1.245822000  | 4.031095000   |
| H  | -1.453255000 | 0.292147000  | 3.622083000   |
| H  | 0.148798000  | -0.475162000 | 3.607318000   |
| H  | -1.151616000 | -1.964110000 | 0.504150000   |
| H  | -1.186301000 | -1.575057000 | 2.233100000   |
| H  | 0.971097000  | 2.591210000  | -2.260978000  |

|   |               |              |               |
|---|---------------|--------------|---------------|
| H | 0.404367000   | 0.951517000  | -2.702127000  |
| H | -3.319710000  | -0.365040000 | 1.982409000   |
| H | -3.134497000  | -0.328224000 | 0.221454000   |
| H | -1.995244000  | 1.838529000  | -2.209783000  |
| H | -1.298520000  | 3.467844000  | -2.255119000  |
| H | -3.356393000  | -2.827927000 | 0.138688000   |
| H | -3.685924000  | -2.859083000 | 1.875516000   |
| H | -0.538863000  | 3.040150000  | -4.633439000  |
| H | -1.157609000  | 1.387261000  | -4.518938000  |
| H | -5.733001000  | -1.471535000 | 1.543998000   |
| H | -5.323476000  | -1.239062000 | -0.159330000  |
| H | -3.470440000  | 2.365972000  | -4.013918000  |
| H | -2.827377000  | 3.966391000  | -4.398823000  |
| H | -2.290072000  | 3.205558000  | -6.723256000  |
| H | -2.827290000  | 1.568585000  | -6.332663000  |
| H | -5.528597000  | -3.747725000 | -0.516256000  |
| H | -6.070798000  | -3.914715000 | 1.153783000   |
| H | -4.629106000  | 4.073754000  | -6.295965000  |
| H | -4.557159000  | 2.869407000  | -7.613123000  |
| H | -8.036894000  | -3.900080000 | -0.281280000  |
| H | -8.047184000  | -2.376407000 | 0.654491000   |
| H | -6.398620000  | -2.616545000 | -8.575173000  |
| H | -9.812136000  | 2.947268000  | -0.279360000  |
| H | -8.071938000  | 2.937571000  | -3.320020000  |
| H | -9.685278000  | 2.311027000  | -3.720201000  |
| H | -9.515723000  | 3.646482000  | -2.549138000  |
| H | -7.875909000  | -3.397482000 | -6.856212000  |
| H | -7.432887000  | -2.817637000 | -5.228492000  |
| H | -8.801872000  | -2.080066000 | -6.087968000  |
| C | -10.182519000 | 2.396440000  | 2.201673000   |
| C | -4.826493000  | -1.972634000 | -10.500514000 |
| H | -10.031328000 | -0.833856000 | 2.436678000   |
| H | -8.369782000  | -0.282664000 | 2.762439000   |
| H | -9.731056000  | 0.387942000  | 3.706853000   |
| H | -3.351529000  | 0.032514000  | -11.052962000 |
| H | -4.426985000  | 1.242059000  | -10.293497000 |
| H | -3.071307000  | 0.555147000  | -9.366388000  |
| H | -10.392637000 | 2.331785000  | 3.273360000   |
| H | -9.492998000  | 3.238403000  | 2.035165000   |
| H | -11.127943000 | 2.602290000  | 1.675729000   |
| H | -4.193534000  | -1.860076000 | -11.385681000 |
| H | -4.499297000  | -2.870618000 | -9.953862000  |
| H | -5.865436000  | -2.119483000 | -10.834964000 |

**The optimized structures of compound L5a, its complexes and coordinates for geometry-optimized structures**

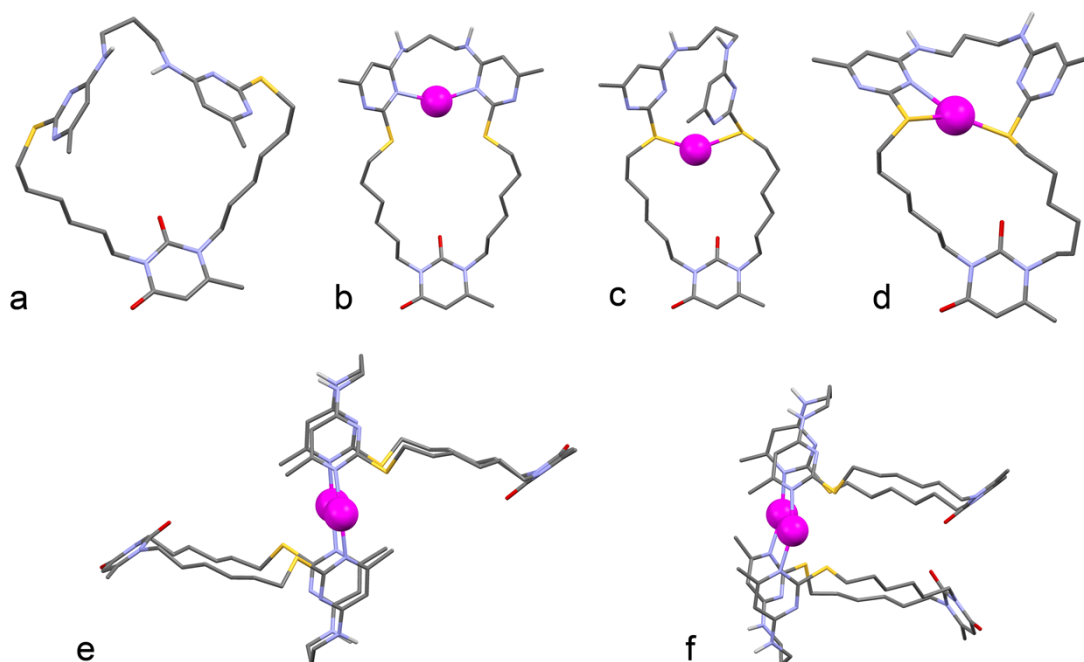

**Fig. 4** The optimized structures of (a) compound L5a and its complexes: [AgL5a]<sup>+</sup> with the (b) N3-Ag<sup>+</sup>-N3, (c) S-Ag<sup>+</sup>-S, (d) N3,S-Ag<sup>+</sup>-S coordination modes; isomers of complex [Ag<sub>2</sub>L5a]<sub>2</sub><sup>2+</sup> with the (e) N1,N1-Ag<sup>+</sup>-N1',N1' (*trans*) and (f) N1,N1-Ag<sup>+</sup>-N1',N1' (*cis*) coordination modes. Only hydrogen atoms of NH groups are shown.

**Coordinates of atoms for structure showed in figure 4a**

86

C30N8H44S2O2

|   |              |              |              |
|---|--------------|--------------|--------------|
| C | -0.409395000 | 0.274896000  | -0.157821000 |
| N | -0.698634000 | -0.340421000 | 1.073346000  |
| C | -0.269040000 | -1.621904000 | 1.373177000  |
| C | 0.469918000  | -2.324591000 | 0.465110000  |
| C | 0.810090000  | -1.789702000 | -0.825849000 |
| N | 0.347164000  | -0.469539000 | -1.058491000 |
| C | -1.592257000 | 0.417643000  | 1.973018000  |
| C | -0.611888000 | -2.201822000 | 2.712448000  |
| H | 0.814693000  | -3.329904000 | 0.696549000  |
| O | 1.453286000  | -2.391829000 | -1.697070000 |
| C | 0.630188000  | 0.147999000  | -2.366220000 |
| O | -0.806940000 | 1.412808000  | -0.414412000 |
| H | -0.238770000 | -3.230543000 | 2.769107000  |
| H | -0.150750000 | -1.623998000 | 3.528078000  |
| H | -1.697470000 | -2.216644000 | 2.888331000  |
| C | -3.071668000 | 0.208341000  | 1.637981000  |

|   |              |              |              |
|---|--------------|--------------|--------------|
| H | -1.372531000 | 0.115157000  | 3.003515000  |
| H | -1.327005000 | 1.476998000  | 1.869668000  |
| C | -0.504773000 | -0.063646000 | -3.372666000 |
| H | 0.798431000  | 1.218715000  | -2.194669000 |
| H | 1.557085000  | -0.312707000 | -2.729695000 |
| C | -4.006831000 | 0.950018000  | 2.597702000  |
| H | -3.250427000 | 0.553543000  | 0.607179000  |
| H | -3.304586000 | -0.869983000 | 1.658387000  |
| C | -0.201543000 | 0.584813000  | -4.726389000 |
| H | -0.669338000 | -1.145555000 | -3.506068000 |
| H | -1.434404000 | 0.361134000  | -2.960310000 |
| C | -5.477019000 | 0.808194000  | 2.192230000  |
| H | -3.863462000 | 0.566424000  | 3.623937000  |
| H | -3.735399000 | 2.020156000  | 2.625154000  |
| C | -1.350794000 | 0.440918000  | -5.729081000 |
| H | 0.014786000  | 1.657802000  | -4.577127000 |
| H | 0.716742000  | 0.139843000  | -5.149451000 |
| C | -6.451569000 | 1.465478000  | 3.171091000  |
| H | -5.615921000 | 1.248376000  | 1.190598000  |
| H | -5.732256000 | -0.260663000 | 2.092579000  |
| C | -1.048537000 | 1.083768000  | -7.084583000 |
| H | -1.580943000 | -0.628770000 | -5.877832000 |
| H | -2.260845000 | 0.899587000  | -5.305841000 |
| C | -2.206244000 | 1.031439000  | -8.083514000 |
| H | -0.730368000 | 2.130301000  | -6.937026000 |
| H | -0.190977000 | 0.568902000  | -7.552728000 |
| C | -7.920786000 | 1.371547000  | 2.752463000  |
| H | -6.360707000 | 0.980724000  | 4.160068000  |
| H | -6.177467000 | 2.524032000  | 3.319356000  |
| S | -3.608103000 | 2.130585000  | -7.596891000 |
| H | -1.881022000 | 1.359775000  | -9.079730000 |
| H | -2.640062000 | 0.024496000  | -8.168740000 |
| S | -8.348504000 | 2.394067000  | 1.279159000  |
| H | -8.207396000 | 0.341415000  | 2.497964000  |
| H | -8.580668000 | 1.737909000  | 3.550769000  |
| C | -5.015281000 | 1.025277000  | -7.525329000 |
| C | -8.320375000 | 1.218561000  | -0.077833000 |
| N | -4.883168000 | -0.251161000 | -7.879822000 |
| C | -6.016372000 | -1.002473000 | -7.815720000 |
| C | -7.226498000 | -0.461429000 | -7.408845000 |
| C | -7.243233000 | 0.910497000  | -7.047991000 |
| N | -6.126426000 | 1.658004000  | -7.111874000 |
| C | -5.881467000 | -2.442508000 | -8.214590000 |
| H | -8.132207000 | -1.068137000 | -7.364061000 |
| N | -8.393708000 | 1.493615000  | -6.580029000 |
| N | -8.455935000 | 1.826338000  | -1.267178000 |
| C | -8.443792000 | 1.016136000  | -2.347754000 |
| C | -8.273973000 | -0.388356000 | -2.202929000 |
| C | -8.156426000 | -0.892370000 | -0.919619000 |
| N | -8.185421000 | -0.080452000 | 0.175381000  |
| N | -8.610064000 | 1.574604000  | -3.573081000 |
| H | -8.249078000 | -1.044907000 | -3.074061000 |
| C | -7.989736000 | -2.359611000 | -0.651773000 |



|   |               |              |              |
|---|---------------|--------------|--------------|
| H | -8.797708000  | -2.719060000 | 0.003226000  |
| H | -7.997506000  | -2.945403000 | -1.579891000 |
| H | -7.041785000  | -2.543016000 | -0.123380000 |
| H | -6.836381000  | -2.977545000 | -8.135943000 |
| H | -5.515625000  | -2.515400000 | -9.249898000 |
| H | -5.137778000  | -2.942519000 | -7.575934000 |
| H | -8.451089000  | 0.990180000  | -4.391522000 |
| C | -8.719833000  | 3.009134000  | -3.818551000 |
| H | -9.247472000  | 0.969006000  | -6.760864000 |
| H | -7.723164000  | 3.487507000  | -3.780493000 |
| C | -9.383914000  | 3.302721000  | -5.165777000 |
| H | -9.311356000  | 3.445364000  | -3.002353000 |
| H | -9.577453000  | 4.385931000  | -5.211428000 |
| C | -8.554375000  | 2.941282000  | -6.402217000 |
| H | -10.369948000 | 2.809287000  | -5.208847000 |
| H | -9.026596000  | 3.374755000  | -7.301081000 |
| H | -7.544835000  | 3.365224000  | -6.326470000 |

**Coordinates of atoms for structure showed in figure 4b**

87

AgC30N8H44S2O2

|   |              |              |              |
|---|--------------|--------------|--------------|
| C | 0.516631000  | 0.991568000  | 0.329792000  |
| N | 0.419296000  | 0.549475000  | 1.660905000  |
| C | 1.399436000  | -0.238051000 | 2.241453000  |
| C | 2.485010000  | -0.624052000 | 1.507970000  |
| C | 2.608685000  | -0.331790000 | 0.103487000  |
| N | 1.575393000  | 0.488615000  | -0.418745000 |
| C | -0.895654000 | 0.793873000  | 2.292821000  |
| C | 1.247080000  | -0.629328000 | 3.680074000  |
| H | 3.270157000  | -1.223555000 | 1.963288000  |
| O | 3.514490000  | -0.747117000 | -0.631570000 |
| C | 1.505244000  | 0.717124000  | -1.874889000 |
| O | -0.324734000 | 1.752584000  | -0.153156000 |
| H | 2.117387000  | -1.217556000 | 3.991741000  |
| H | 1.174079000  | 0.254436000  | 4.331796000  |
| H | 0.345561000  | -1.239314000 | 3.842567000  |
| C | -1.941468000 | -0.178919000 | 1.732752000  |
| H | -0.783743000 | 0.703547000  | 3.378219000  |
| H | -1.180503000 | 1.828889000  | 2.066201000  |
| C | 0.444539000  | -0.199178000 | -2.498224000 |
| H | 1.253806000  | 1.772492000  | -2.041747000 |
| H | 2.506753000  | 0.514990000  | -2.271612000 |
| C | -3.390829000 | 0.145665000  | 2.112588000  |
| H | -1.861331000 | -0.148884000 | 0.634695000  |
| H | -1.692092000 | -1.208147000 | 2.040215000  |
| C | 0.116317000  | 0.101069000  | -3.964390000 |
| H | 0.767042000  | -1.247982000 | -2.392500000 |
| H | -0.481574000 | -0.086712000 | -1.912016000 |
| C | -4.368581000 | -0.541763000 | 1.151999000  |
| H | -3.597116000 | -0.160803000 | 3.152235000  |
| H | -3.552032000 | 1.236908000  | 2.068744000  |
| C | -1.205383000 | -0.561288000 | -4.370289000 |

|   |               |              |               |
|---|---------------|--------------|---------------|
| H | 0.031756000   | 1.192086000  | -4.111401000  |
| H | 0.933320000   | -0.242282000 | -4.621525000  |
| C | -5.845994000  | -0.379841000 | 1.516054000   |
| H | -4.192681000  | -0.134755000 | 0.139511000   |
| H | -4.132263000  | -1.618928000 | 1.091827000   |
| C | -1.581002000  | -0.391271000 | -5.843993000  |
| H | -1.167079000  | -1.639193000 | -4.132826000  |
| H | -2.006255000  | -0.138532000 | -3.736244000  |
| C | -2.967020000  | -0.931846000 | -6.187068000  |
| H | -1.518074000  | 0.670097000  | -6.135971000  |
| H | -0.855757000  | -0.933783000 | -6.474646000  |
| C | -6.795856000  | -0.938723000 | 0.459674000   |
| H | -6.053976000  | -0.916245000 | 2.458014000   |
| H | -6.083524000  | 0.680931000  | 1.699995000   |
| S | -4.289050000  | 0.115367000  | -5.414205000  |
| H | -3.179161000  | -0.902165000 | -7.263387000  |
| H | -3.101231000  | -1.962427000 | -5.830790000  |
| S | -6.793686000  | 0.111428000  | -1.069654000  |
| H | -6.517656000  | -1.959472000 | 0.163180000   |
| H | -7.843836000  | -0.941095000 | 0.787266000   |
| C | -5.565586000  | 0.118871000  | -6.656381000  |
| C | -8.527004000  | 0.215729000  | -1.477236000  |
| N | -5.440686000  | -0.590766000 | -7.764999000  |
| C | -6.483795000  | -0.542633000 | -8.641158000  |
| C | -7.586119000  | 0.265758000  | -8.407941000  |
| C | -7.609193000  | 1.043189000  | -7.227929000  |
| N | -6.613233000  | 0.911850000  | -6.314057000  |
| C | -6.354273000  | -1.380400000 | -9.874189000  |
| H | -8.394646000  | 0.343661000  | -9.135241000  |
| N | -8.628477000  | 1.919066000  | -6.971756000  |
| N | -8.751044000  | 1.004138000  | -2.559263000  |
| C | -10.046289000 | 1.193507000  | -2.922717000  |
| C | -11.073219000 | 0.483729000  | -2.257413000  |
| C | -10.728606000 | -0.316976000 | -1.180266000  |
| N | -9.434545000  | -0.427983000 | -0.765068000  |
| N | -10.331439000 | 2.055552000  | -3.942940000  |
| H | -12.113321000 | 0.609195000  | -2.559595000  |
| C | -11.746756000 | -1.079130000 | -0.391859000  |
| H | -11.510776000 | -2.153840000 | -0.417169000  |
| H | -11.715707000 | -0.769974000 | 0.663672000   |
| H | -12.760723000 | -0.926761000 | -0.780837000  |
| H | -7.225010000  | -1.274422000 | -10.532393000 |
| H | -5.446758000  | -1.098535000 | -10.428844000 |
| H | -6.242081000  | -2.439227000 | -9.595520000  |
| H | -11.327572000 | 2.104955000  | -4.152387000  |
| C | -9.638932000  | 3.341806000  | -4.121988000  |
| H | -9.339940000  | 1.917994000  | -7.701624000  |
| H | -8.636190000  | 3.259897000  | -3.678512000  |
| C | -9.539348000  | 3.821955000  | -5.570913000  |
| H | -10.177020000 | 4.104168000  | -3.532238000  |
| H | -9.388953000  | 4.912315000  | -5.530625000  |
| C | -8.389130000  | 3.258282000  | -6.405640000  |
| H | -10.500512000 | 3.673799000  | -6.090638000  |

|    |              |             |              |
|----|--------------|-------------|--------------|
| H  | -8.185622000 | 3.951622000 | -7.240297000 |
| H  | -7.469600000 | 3.218162000 | -5.804608000 |
| Ag | -7.082033000 | 1.143346000 | -4.101262000 |

**Coordinates of atoms for structure showed in figure 4c**

87

AgC<sub>30</sub>N<sub>8</sub>H<sub>44</sub>S<sub>2</sub>O<sub>2</sub>

|   |              |              |              |
|---|--------------|--------------|--------------|
| C | 0.657628000  | 0.495756000  | 0.346699000  |
| N | 0.477586000  | 0.200213000  | 1.708865000  |
| C | 1.204599000  | -0.793554000 | 2.342501000  |
| C | 2.108224000  | -1.532247000 | 1.632805000  |
| C | 2.272235000  | -1.389058000 | 0.209268000  |
| N | 1.507453000  | -0.341529000 | -0.366781000 |
| C | -0.689021000 | 0.867321000  | 2.325476000  |
| C | 0.989022000  | -1.015552000 | 3.808722000  |
| H | 2.698475000  | -2.300341000 | 2.127594000  |
| O | 2.996703000  | -2.100962000 | -0.498564000 |
| C | 1.480188000  | -0.188297000 | -1.833172000 |
| O | 0.051657000  | 1.426128000  | -0.190104000 |
| H | 1.657560000  | -1.809657000 | 4.159442000  |
| H | 1.199478000  | -0.103848000 | 4.388093000  |
| H | -0.046391000 | -1.318027000 | 4.026824000  |
| C | -1.990768000 | 0.204820000  | 1.851954000  |
| H | -0.576869000 | 0.833729000  | 3.413910000  |
| H | -0.664317000 | 1.918925000  | 2.013968000  |
| C | 0.186099000  | -0.781944000 | -2.406310000 |
| H | 1.547799000  | 0.883208000  | -2.061991000 |
| H | 2.370674000  | -0.698480000 | -2.217827000 |
| C | -3.253843000 | 1.039378000  | 2.087546000  |
| H | -1.896485000 | 0.034426000  | 0.767921000  |
| H | -2.096294000 | -0.787863000 | 2.320205000  |
| C | -0.090017000 | -0.400396000 | -3.863211000 |
| H | 0.209580000  | -1.878573000 | -2.298219000 |
| H | -0.652723000 | -0.414599000 | -1.793796000 |
| C | -4.410532000 | 0.542042000  | 1.212613000  |
| H | -3.544185000 | 1.015691000  | 3.151625000  |
| H | -3.047746000 | 2.095376000  | 1.840879000  |
| C | -1.542155000 | -0.699758000 | -4.252555000 |
| H | 0.102554000  | 0.677512000  | -4.004238000 |
| H | 0.598690000  | -0.933830000 | -4.540276000 |
| C | -5.726510000 | 1.291656000  | 1.428909000  |
| H | -4.103995000 | 0.633499000  | 0.155181000  |
| H | -4.576855000 | -0.534451000 | 1.393137000  |
| C | -1.875138000 | -0.364909000 | -5.708161000 |
| H | -1.766479000 | -1.764736000 | -4.065124000 |
| H | -2.200567000 | -0.121211000 | -3.577361000 |
| C | -3.336951000 | -0.582395000 | -6.091954000 |
| H | -1.580992000 | 0.672943000  | -5.936797000 |
| H | -1.276704000 | -1.008550000 | -6.374913000 |
| C | -6.826412000 | 0.913174000  | 0.438593000  |
| H | -6.113820000 | 1.070704000  | 2.437700000  |
| H | -5.557407000 | 2.381519000  | 1.401645000  |

|    |               |              |              |
|----|---------------|--------------|--------------|
| S  | -4.415354000  | 0.715829000  | -5.318154000 |
| H  | -3.496989000  | -0.465688000 | -7.170404000 |
| H  | -3.705172000  | -1.571214000 | -5.791471000 |
| S  | -6.548809000  | 1.741881000  | -1.211934000 |
| H  | -6.869770000  | -0.170974000 | 0.267251000  |
| H  | -7.807642000  | 1.269022000  | 0.777769000  |
| C  | -5.985254000  | 0.520545000  | -6.229293000 |
| C  | -7.869801000  | 0.925590000  | -2.172877000 |
| N  | -6.051988000  | -0.450790000 | -7.121748000 |
| C  | -7.232218000  | -0.523250000 | -7.812898000 |
| C  | -8.260577000  | 0.364703000  | -7.564650000 |
| C  | -8.063003000  | 1.367149000  | -6.573733000 |
| N  | -6.892098000  | 1.443528000  | -5.894540000 |
| C  | -7.332077000  | -1.606912000 | -8.841979000 |
| H  | -9.199502000  | 0.307636000  | -8.117490000 |
| N  | -9.053483000  | 2.249320000  | -6.293040000 |
| N  | -8.922571000  | 1.657206000  | -2.481275000 |
| C  | -9.863859000  | 1.051617000  | -3.258119000 |
| C  | -9.759955000  | -0.331778000 | -3.559838000 |
| C  | -8.594429000  | -0.990189000 | -3.211801000 |
| N  | -7.597753000  | -0.339040000 | -2.534323000 |
| N  | -10.874250000 | 1.814219000  | -3.728446000 |
| H  | -10.545551000 | -0.844555000 | -4.116167000 |
| C  | -8.332598000  | -2.418069000 | -3.576659000 |
| H  | -7.448808000  | -2.486998000 | -4.230140000 |
| H  | -8.111664000  | -3.006519000 | -2.673913000 |
| H  | -9.188571000  | -2.865751000 | -4.095591000 |
| H  | -8.311061000  | -1.608023000 | -9.337015000 |
| H  | -6.548055000  | -1.477196000 | -9.603420000 |
| H  | -7.165014000  | -2.589657000 | -8.375819000 |
| H  | -11.544250000 | 1.356785000  | -4.341728000 |
| C  | -10.866400000 | 3.275747000  | -3.705658000 |
| H  | -9.853828000  | 2.224035000  | -6.920535000 |
| H  | -10.257386000 | 3.579239000  | -2.845782000 |
| C  | -10.320891000 | 3.925347000  | -4.990501000 |
| H  | -11.894963000 | 3.621445000  | -3.528366000 |
| H  | -10.266015000 | 5.008065000  | -4.798628000 |
| C  | -8.937852000  | 3.443458000  | -5.454815000 |
| H  | -11.045186000 | 3.804661000  | -5.814710000 |
| H  | -8.441675000  | 4.248016000  | -6.024855000 |
| H  | -8.289114000  | 3.208988000  | -4.600749000 |
| Ag | -5.236396000  | 0.115024000  | -2.964596000 |

**Coordinates of atoms for structure showed in figure 4d**

87

AgC30N8H44S2O2

|   |              |             |              |
|---|--------------|-------------|--------------|
| C | -1.042262000 | 1.181882000 | 0.175796000  |
| N | -0.809852000 | 1.034308000 | 1.554778000  |
| C | 0.452743000  | 0.760841000 | 2.057728000  |
| C | 1.501360000  | 0.557800000 | 1.207880000  |
| C | 1.346243000  | 0.591528000 | -0.221343000 |
| N | 0.041477000  | 0.936113000 | -0.662264000 |

|   |              |              |               |
|---|--------------|--------------|---------------|
| C | -1.986895000 | 1.112208000  | 2.445626000   |
| C | 0.633876000  | 0.725887000  | 3.544689000   |
| H | 2.494003000  | 0.346474000  | 1.599229000   |
| O | 2.244355000  | 0.357605000  | -1.041018000  |
| C | -0.213726000 | 1.001455000  | -2.111374000  |
| O | -2.147513000 | 1.502863000  | -0.267963000  |
| H | 1.678143000  | 0.493135000  | 3.780819000   |
| H | 0.386785000  | 1.699740000  | 3.995018000   |
| H | -0.006159000 | -0.029650000 | 4.021900000   |
| C | -2.482058000 | -0.267750000 | 2.952840000   |
| H | -1.728448000 | 1.769688000  | 3.284624000   |
| H | -2.766241000 | 1.615995000  | 1.863465000   |
| C | -0.883253000 | -0.272058000 | -2.635510000  |
| H | -0.850558000 | 1.875791000  | -2.299157000  |
| H | 0.762490000  | 1.153272000  | -2.587579000  |
| C | -3.917784000 | -0.633345000 | 2.547943000   |
| H | -1.797550000 | -1.052483000 | 2.590455000   |
| H | -2.413431000 | -0.286799000 | 4.051454000   |
| C | -1.180345000 | -0.204821000 | -4.135974000  |
| H | -0.233256000 | -1.136285000 | -2.421805000  |
| H | -1.824617000 | -0.425957000 | -2.083134000  |
| C | -4.105952000 | -0.924406000 | 1.055248000   |
| H | -4.217916000 | -1.522532000 | 3.128774000   |
| H | -4.603769000 | 0.175829000  | 2.855219000   |
| C | -2.026476000 | -1.387896000 | -4.614926000  |
| H | -1.713120000 | 0.735635000  | -4.364710000  |
| H | -0.233839000 | -0.170032000 | -4.702623000  |
| C | -5.514082000 | -1.424899000 | 0.721253000   |
| H | -3.880781000 | -0.019702000 | 0.467106000   |
| H | -3.371165000 | -1.687760000 | 0.740426000   |
| C | -2.304792000 | -1.376269000 | -6.119256000  |
| H | -1.529044000 | -2.335644000 | -4.344995000  |
| H | -2.986309000 | -1.380531000 | -4.065211000  |
| C | -3.277021000 | -2.454113000 | -6.587749000  |
| H | -2.675996000 | -0.385443000 | -6.432263000  |
| H | -1.360135000 | -1.533479000 | -6.668198000  |
| C | -5.768429000 | -1.621003000 | -0.770737000  |
| H | -5.685101000 | -2.401596000 | 1.207256000   |
| H | -6.276691000 | -0.743111000 | 1.131589000   |
| S | -5.031733000 | -2.199961000 | -6.047873000  |
| H | -3.332697000 | -2.518046000 | -7.682558000  |
| H | -3.017588000 | -3.446629000 | -6.192418000  |
| S | -5.895351000 | -0.011553000 | -1.678458000  |
| H | -4.944305000 | -2.160468000 | -1.259108000  |
| H | -6.711213000 | -2.147716000 | -0.962582000  |
| C | -5.531907000 | -0.850828000 | -7.146653000  |
| C | -7.675327000 | 0.372808000  | -1.547063000  |
| N | -5.247902000 | -0.938645000 | -8.427026000  |
| C | -5.682383000 | 0.099490000  | -9.209799000  |
| C | -6.418394000 | 1.136151000  | -8.671502000  |
| C | -6.691074000 | 1.130666000  | -7.276183000  |
| N | -6.204855000 | 0.125456000  | -6.495408000  |
| C | -5.327956000 | 0.028472000  | -10.661504000 |

|    |               |              |               |
|----|---------------|--------------|---------------|
| H  | -6.776464000  | 1.956627000  | -9.294534000  |
| N  | -7.408142000  | 2.122517000  | -6.711235000  |
| N  | -7.981563000  | 1.482461000  | -2.217763000  |
| C  | -9.289176000  | 1.830533000  | -2.195711000  |
| C  | -10.229736000 | 1.050652000  | -1.469461000  |
| C  | -9.769249000  | -0.070248000 | -0.802143000  |
| N  | -8.448026000  | -0.431628000 | -0.843545000  |
| N  | -9.665294000  | 2.932358000  | -2.888647000  |
| H  | -11.283319000 | 1.331361000  | -1.437908000  |
| C  | -10.672060000 | -0.954548000 | 0.000821000   |
| H  | -10.633195000 | -1.984536000 | -0.384753000  |
| H  | -10.330767000 | -0.991264000 | 1.046438000   |
| H  | -11.711025000 | -0.603478000 | -0.022733000  |
| H  | -5.717374000  | 0.889100000  | -11.218620000 |
| H  | -4.234498000  | -0.011002000 | -10.779701000 |
| H  | -5.730438000  | -0.896368000 | -11.101562000 |
| H  | -10.648838000 | 3.183812000  | -2.858883000  |
| C  | -8.748239000  | 3.847444000  | -3.562116000  |
| H  | -7.703870000  | 2.875026000  | -7.327839000  |
| H  | -7.795012000  | 3.843213000  | -3.014953000  |
| C  | -8.502653000  | 3.541489000  | -5.046402000  |
| H  | -9.177951000  | 4.854858000  | -3.476026000  |
| H  | -7.951624000  | 4.398725000  | -5.469092000  |
| C  | -7.696767000  | 2.265213000  | -5.288015000  |
| H  | -9.467663000  | 3.481270000  | -5.575910000  |
| H  | -6.753889000  | 2.307890000  | -4.715899000  |
| H  | -8.252529000  | 1.382423000  | -4.935507000  |
| Ag | -5.772968000  | -0.378489000 | -4.177742000  |

**Coordinates of atoms for structure showed in figure 4e**

174

Ag<sub>2</sub>C<sub>60</sub>N<sub>16</sub>H<sub>88</sub>S<sub>4</sub>O<sub>4</sub>

|   |               |              |               |
|---|---------------|--------------|---------------|
| N | -7.697035000  | -4.986637000 | -4.056666000  |
| C | -8.489459000  | -6.043412000 | -4.344885000  |
| N | -8.102809000  | -7.294933000 | -4.543443000  |
| C | -6.776884000  | -7.553153000 | -4.406316000  |
| C | -5.874250000  | -6.526402000 | -4.012143000  |
| C | -6.361988000  | -5.243050000 | -3.886160000  |
| S | -10.218544000 | -5.608266000 | -4.497098000  |
| C | -11.076654000 | -7.113865000 | -3.827760000  |
| C | -12.567940000 | -7.050797000 | -4.160257000  |
| C | -12.887268000 | -7.428116000 | -5.608452000  |
| C | -14.332526000 | -7.142061000 | -6.032762000  |
| C | -14.604030000 | -7.679602000 | -7.441544000  |
| C | -15.842150000 | -7.083957000 | -8.122224000  |
| N | -15.910217000 | -7.515747000 | -9.534590000  |
| C | -14.985611000 | -6.885584000 | -10.385175000 |
| N | -14.778609000 | -7.475804000 | -11.626321000 |
| C | -15.502960000 | -8.595835000 | -12.114734000 |
| C | -16.507783000 | -9.094961000 | -11.213267000 |
| C | -16.667411000 | -8.598743000 | -9.951202000  |
| O | -14.366200000 | -5.881448000 | -10.024150000 |

|   |               |               |               |
|---|---------------|---------------|---------------|
| C | -17.665693000 | -9.186197000  | -9.000352000  |
| O | -15.245744000 | -9.073481000  | -13.227387000 |
| C | -13.632483000 | -6.974552000  | -12.407476000 |
| C | -12.315252000 | -7.481490000  | -11.809674000 |
| C | -11.061080000 | -6.971137000  | -12.524556000 |
| C | -9.802098000  | -7.250481000  | -11.695329000 |
| C | -8.491158000  | -6.945883000  | -12.423129000 |
| C | -7.251897000  | -7.070902000  | -11.536536000 |
| S | -7.081687000  | -5.566392000  | -10.460499000 |
| C | -5.860300000  | -6.081719000  | -9.259063000  |
| N | -5.052716000  | -5.076386000  | -8.850231000  |
| C | -4.068940000  | -5.402419000  | -7.953341000  |
| C | -3.928966000  | -6.699923000  | -7.507452000  |
| C | -4.880966000  | -7.665968000  | -7.936170000  |
| N | -5.837979000  | -7.338265000  | -8.841081000  |
| C | -3.160097000  | -4.299071000  | -7.511652000  |
| N | -4.874387000  | -8.915094000  | -7.426290000  |
| C | -5.901897000  | -9.935081000  | -7.630375000  |
| C | -6.277668000  | -10.660485000 | -6.331001000  |
| C | -7.101325000  | -9.867658000  | -5.308535000  |
| N | -6.328967000  | -8.793836000  | -4.686097000  |
| C | -5.487806000  | -4.077914000  | -3.542666000  |
| C | -5.163658000  | 1.508967000   | -1.277126000  |
| C | -6.582046000  | 1.165569000   | -0.816651000  |
| C | -7.619154000  | 1.226706000   | -1.938809000  |
| S | -7.498118000  | -0.301081000  | -2.988496000  |
| C | -8.490447000  | 0.122182000   | -4.416008000  |
| N | -8.495659000  | 1.365698000   | -4.873040000  |
| C | -9.273851000  | 1.613361000   | -5.957898000  |
| C | -10.080051000 | 0.586224000   | -6.523092000  |
| C | -9.962208000  | -0.689440000  | -6.013506000  |
| N | -9.150488000  | -0.936114000  | -4.937800000  |
| N | -9.238480000  | 2.843251000   | -6.509408000  |
| C | -8.301367000  | 3.912154000   | -6.168122000  |
| C | -7.833043000  | 4.691895000   | -7.402928000  |
| C | -6.911062000  | 3.951568000   | -8.381848000  |
| N | -7.617909000  | 2.933401000   | -9.157306000  |
| C | -7.192797000  | 1.674757000   | -9.393362000  |
| C | -8.056870000  | 0.714632000   | -9.988865000  |
| C | -7.621995000  | -0.591489000  | -10.072121000 |
| N | -6.358265000  | -0.932979000  | -9.666415000  |
| C | -5.580793000  | 0.067821000   | -9.192430000  |
| N | -5.933997000  | 1.332617000   | -9.019127000  |
| S | -3.932997000  | -0.463774000  | -8.744365000  |
| C | -2.903740000  | 1.030830000   | -9.139950000  |
| C | -1.514236000  | 0.891907000   | -8.517416000  |
| C | -1.477712000  | 1.200798000   | -7.019333000  |
| C | -0.130254000  | 0.907397000   | -6.349355000  |
| C | -0.107716000  | 1.426579000   | -4.909104000  |
| C | 1.066684000   | 0.910192000   | -4.070483000  |
| N | 0.981383000   | 1.427106000   | -2.691898000  |
| C | 0.006677000   | 0.860911000   | -1.878897000  |
| N | -0.247450000  | 1.507321000   | -0.656990000  |

|   |               |              |               |
|---|---------------|--------------|---------------|
| C | 0.513133000   | 2.582329000  | -0.225998000  |
| C | 1.527579000   | 3.054892000  | -1.008292000  |
| C | 1.786378000   | 2.539052000  | -2.326748000  |
| O | -0.635071000  | -0.136106000 | -2.220149000  |
| C | -1.507912000  | 1.104978000  | 0.002803000   |
| C | -2.709722000  | 1.717752000  | -0.725968000  |
| C | -4.072747000  | 1.213113000  | -0.241327000  |
| C | 0.209638000   | 3.187309000  | 1.111037000   |
| O | 2.621245000   | 2.996649000  | -3.117853000  |
| C | -8.479066000  | -1.689289000 | -10.619017000 |
| C | -10.712610000 | -1.855403000 | -6.576659000  |
| H | 2.142499000   | 3.885087000  | -0.668001000  |
| H | 0.917300000   | 3.999262000  | 1.312159000   |
| H | -0.808475000  | 3.603415000  | 1.149070000   |
| H | 0.296960000   | 2.443981000  | 1.917895000   |
| H | -1.561137000  | 0.009629000  | -0.030965000  |
| H | -1.463444000  | 1.408837000  | 1.053772000   |
| H | 2.028475000   | 1.253082000  | -4.469635000  |
| H | 1.062113000   | -0.186701000 | -4.025328000  |
| H | -2.667026000  | 2.817013000  | -0.648180000  |
| H | -2.608683000  | 1.471111000  | -1.794775000  |
| H | -1.043757000  | 1.126955000  | -4.411060000  |
| H | -0.082992000  | 2.528831000  | -4.915939000  |
| H | -4.026974000  | 0.123411000  | -0.068910000  |
| H | -4.330510000  | 1.672589000  | 0.728159000   |
| H | 0.689290000   | 1.366045000  | -6.928832000  |
| H | 0.051110000   | -0.181909000 | -6.359573000  |
| H | -5.129284000  | 2.577299000  | -1.553855000  |
| H | -4.930565000  | 0.946198000  | -2.197851000  |
| H | -2.263588000  | 0.622745000  | -6.502504000  |
| H | -1.733395000  | 2.265185000  | -6.873656000  |
| H | -0.849689000  | 1.590481000  | -9.052537000  |
| H | -1.108650000  | -0.115471000 | -8.715152000  |
| H | -6.602357000  | 0.170768000  | -0.338880000  |
| H | -6.902323000  | 1.877314000  | -0.037868000  |
| H | -3.444274000  | 1.903850000  | -8.751391000  |
| H | -2.852564000  | 1.093093000  | -10.234142000 |
| H | -8.642260000  | 1.256741000  | -1.543951000  |
| H | -7.459705000  | 2.086248000  | -2.603116000  |
| H | -9.055828000  | 0.990464000  | -10.327163000 |
| H | -10.735554000 | 0.788814000  | -7.370247000  |
| H | -10.017839000 | -2.661991000 | -6.860042000  |
| H | -11.398759000 | -2.267950000 | -5.820940000  |
| H | -11.298502000 | -1.570559000 | -7.458711000  |
| H | -9.485527000  | -1.330087000 | -10.864651000 |
| H | -8.026290000  | -2.109256000 | -11.530474000 |
| H | -8.565700000  | -2.510618000 | -9.890284000  |
| H | -9.895522000  | 3.023816000  | -7.263511000  |
| H | -8.524139000  | 3.188415000  | -9.542139000  |
| H | -7.450972000  | 3.452599000  | -5.646593000  |
| H | -8.775427000  | 4.613764000  | -5.461229000  |
| H | -7.280179000  | 5.571116000  | -7.038124000  |
| H | -8.705959000  | 5.097875000  | -7.944622000  |



|    |               |               |               |
|----|---------------|---------------|---------------|
| H  | -6.455078000  | 4.685765000   | -9.066620000  |
| H  | -6.092136000  | 3.448925000   | -7.850816000  |
| H  | -17.112997000 | -9.931666000  | -11.555007000 |
| H  | -18.196652000 | -10.008676000 | -9.492397000  |
| H  | -17.182176000 | -9.583906000  | -8.095263000  |
| H  | -18.406467000 | -8.437336000  | -8.681531000  |
| H  | -15.788637000 | -5.988099000  | -8.116131000  |
| H  | -16.770410000 | -7.379578000  | -7.622432000  |
| H  | -13.775752000 | -7.336129000  | -13.432481000 |
| H  | -13.667692000 | -5.877314000  | -12.400675000 |
| H  | -14.691025000 | -8.778648000  | -7.413948000  |
| H  | -13.734036000 | -7.445761000  | -8.075399000  |
| H  | -12.272941000 | -7.166405000  | -10.754719000 |
| H  | -12.320889000 | -8.583992000  | -11.818278000 |
| H  | -14.504542000 | -6.051580000  | -6.010516000  |
| H  | -15.038427000 | -7.584781000  | -5.309435000  |
| H  | -10.973792000 | -7.444062000  | -13.517801000 |
| H  | -11.145520000 | -5.884397000  | -12.701909000 |
| H  | -12.666229000 | -8.500249000  | -5.752694000  |
| H  | -12.210432000 | -6.881375000  | -6.287952000  |
| H  | -9.854126000  | -6.661093000  | -10.763273000 |
| H  | -9.795377000  | -8.311163000  | -11.388059000 |
| H  | -8.362283000  | -7.653542000  | -13.258971000 |
| H  | -8.528154000  | -5.943785000  | -12.884471000 |
| H  | -12.964096000 | -6.047417000  | -3.926656000  |
| H  | -13.083888000 | -7.742633000  | -3.474043000  |
| H  | -7.310608000  | -7.938202000  | -10.865867000 |
| H  | -6.332784000  | -7.133797000  | -12.132348000 |
| H  | -10.903023000 | -7.118969000  | -2.744516000  |
| H  | -10.589067000 | -7.988211000  | -4.278638000  |
| H  | -3.136412000  | -6.964368000  | -6.807197000  |
| H  | -4.814894000  | -6.736264000  | -3.863394000  |
| H  | -5.585828000  | -3.284395000  | -4.300528000  |
| H  | -5.792854000  | -3.644656000  | -2.577564000  |
| H  | -4.433181000  | -4.370221000  | -3.474298000  |
| H  | -2.447737000  | -4.643652000  | -6.752604000  |
| H  | -2.592988000  | -3.905314000  | -8.369248000  |
| H  | -3.742872000  | -3.462398000  | -7.095376000  |
| H  | -5.349066000  | -8.979485000  | -4.490098000  |
| H  | -4.086577000  | -9.161230000  | -6.832079000  |
| H  | -7.981420000  | -9.410674000  | -5.780580000  |
| H  | -7.470698000  | -10.560072000 | -4.533468000  |
| H  | -6.874641000  | -11.541609000 | -6.612118000  |
| H  | -5.368301000  | -11.063047000 | -5.850107000  |
| H  | -5.544028000  | -10.677807000 | -8.362678000  |
| H  | -6.774897000  | -9.436940000  | -8.072023000  |
| Ag | -5.574116000  | -3.013685000  | -9.516512000  |
| Ag | -8.609695000  | -2.957133000  | -4.170188000  |

**Coordinates of atoms for structure showed in figure 4f**

174

Ag<sub>2</sub>C<sub>60</sub>N<sub>16</sub>H<sub>88</sub>S<sub>4</sub>O<sub>4</sub>

|   |              |              |              |
|---|--------------|--------------|--------------|
| N | -6.281993000 | -4.934669000 | -9.416561000 |
|---|--------------|--------------|--------------|

|   |               |               |              |
|---|---------------|---------------|--------------|
| C | -5.197922000  | -5.716285000  | -9.202588000 |
| N | -5.191150000  | -6.937832000  | -8.686998000 |
| C | -6.395261000  | -7.471175000  | -8.362132000 |
| C | -7.601266000  | -6.769418000  | -8.640365000 |
| C | -7.502694000  | -5.489144000  | -9.141898000 |
| S | -3.668391000  | -4.921422000  | -9.665590000 |
| C | -2.514433000  | -6.342419000  | -9.961106000 |
| C | -1.069341000  | -5.941393000  | -9.661782000 |
| C | -0.734030000  | -5.933812000  | -8.169244000 |
| C | 0.640616000   | -5.341248000  | -7.838743000 |
| C | 0.977207000   | -5.510694000  | -6.353848000 |
| C | 2.132249000   | -4.625721000  | -5.871556000 |
| N | 2.292445000   | -4.718639000  | -4.405494000 |
| C | 1.315776000   | -4.029953000  | -3.664449000 |
| N | 1.267033000   | -4.294694000  | -2.299990000 |
| C | 2.165597000   | -5.152767000  | -1.615754000 |
| C | 3.184483000   | -5.737653000  | -2.448023000 |
| C | 3.216454000   | -5.554710000  | -3.801032000 |
| O | 0.528255000   | -3.256184000  | -4.213437000 |
| C | 4.247850000   | -6.226028000  | -4.656559000 |
| O | 2.036842000   | -5.358205000  | -0.401113000 |
| C | 0.108416000   | -3.744946000  | -1.570171000 |
| C | -1.141548000  | -4.591655000  | -1.836780000 |
| C | -2.435985000  | -3.979118000  | -1.294422000 |
| C | -3.660259000  | -4.750070000  | -1.798253000 |
| C | -4.999655000  | -4.200636000  | -1.303896000 |
| C | -6.211230000  | -4.947422000  | -1.857876000 |
| S | -6.468853000  | -4.534581000  | -3.661189000 |
| C | -7.602541000  | -5.873486000  | -4.115098000 |
| N | -8.885367000  | -5.485120000  | -4.256046000 |
| C | -9.790648000  | -6.464213000  | -4.575987000 |
| C | -9.374431000  | -7.768717000  | -4.752203000 |
| C | -7.987306000  | -8.061006000  | -4.634357000 |
| N | -7.105132000  | -7.085216000  | -4.291300000 |
| C | -11.220731000 | -6.044522000  | -4.702879000 |
| N | -7.511661000  | -9.299436000  | -4.888859000 |
| C | -6.109192000  | -9.715750000  | -4.821260000 |
| C | -5.603166000  | -10.356391000 | -6.123654000 |
| C | -5.247978000  | -9.395078000  | -7.260122000 |
| N | -6.420103000  | -8.669769000  | -7.747156000 |
| C | -8.708295000  | -4.652960000  | -9.443152000 |
| C | -5.700795000  | 1.383832000   | -1.208582000 |
| C | -7.108379000  | 1.128069000   | -0.666691000 |
| C | -8.186518000  | 1.115774000   | -1.751285000 |
| S | -8.190021000  | -0.503400000  | -2.654763000 |
| C | -8.794938000  | -0.072980000  | -4.277772000 |
| N | -8.672181000  | 1.166144000   | -4.733565000 |
| C | -9.158236000  | 1.411518000   | -5.975825000 |
| C | -9.834495000  | 0.395399000   | -6.706958000 |
| C | -9.877398000  | -0.871083000  | -6.164025000 |
| N | -9.334538000  | -1.126539000  | -4.933978000 |
| N | -8.963132000  | 2.633069000   | -6.509873000 |
| C | -8.143965000  | 3.691474000   | -5.921428000 |

|   |               |              |               |
|---|---------------|--------------|---------------|
| C | -7.654157000  | 4.686587000  | -6.975623000  |
| C | -6.687891000  | 4.135429000  | -8.036550000  |
| N | -7.359386000  | 3.369140000  | -9.088532000  |
| C | -7.085210000  | 2.094637000  | -9.442697000  |
| C | -7.821906000  | 1.444032000  | -10.470903000 |
| C | -7.565603000  | 0.111080000  | -10.723010000 |
| N | -6.593023000  | -0.552452000 | -10.020153000 |
| C | -5.915712000  | 0.166108000  | -9.102659000  |
| N | -6.107383000  | 1.430933000  | -8.770889000  |
| S | -4.629808000  | -0.767798000 | -8.232335000  |
| C | -3.116234000  | -0.058805000 | -9.064839000  |
| C | -1.855390000  | -0.416815000 | -8.280560000  |
| C | -1.705882000  | 0.357003000  | -6.969326000  |
| C | -0.474050000  | -0.029638000 | -6.144329000  |
| C | -0.397609000  | 0.792957000  | -4.854960000  |
| C | 0.672169000   | 0.309756000  | -3.868787000  |
| N | 0.543470000   | 1.021100000  | -2.582391000  |
| C | -0.489858000  | 0.604407000  | -1.750106000  |
| N | -0.757406000  | 1.407598000  | -0.627245000  |
| C | 0.020456000   | 2.509443000  | -0.312526000  |
| C | 1.073998000   | 2.848505000  | -1.112639000  |
| C | 1.368949000   | 2.147901000  | -2.335326000  |
| O | -1.164845000  | -0.399115000 | -1.990341000  |
| C | -2.026494000  | 1.097511000  | 0.063384000   |
| C | -3.225905000  | 1.614495000  | -0.739184000  |
| C | -4.585111000  | 1.188059000  | -0.175632000  |
| C | -0.308542000  | 3.294168000  | 0.921287000   |
| O | 2.252333000   | 2.469028000  | -3.141940000  |
| C | -8.300396000  | -0.674143000 | -11.762646000 |
| C | -10.540470000 | -2.018650000 | -6.861812000  |
| H | 1.699742000   | 3.702712000  | -0.863710000  |
| H | 0.404505000   | 4.119139000  | 1.028845000   |
| H | -1.322183000  | 3.720225000  | 0.876097000   |
| H | -0.249949000  | 2.667284000  | 1.824025000   |
| H | -2.083473000  | 0.006133000  | 0.164039000   |
| H | -1.989369000  | 1.529338000  | 1.069031000   |
| H | 1.683032000   | 0.517293000  | -4.238954000  |
| H | 0.564402000   | -0.765917000 | -3.681165000  |
| H | -3.177591000  | 2.714189000  | -0.809040000  |
| H | -3.133645000  | 1.223883000  | -1.764703000  |
| H | -1.376538000  | 0.737948000  | -4.351395000  |
| H | -0.216454000  | 1.853853000  | -5.095378000  |
| H | -4.548606000  | 0.123769000  | 0.117107000   |
| H | -4.813186000  | 1.755641000  | 0.742992000   |
| H | 0.442297000   | 0.114209000  | -6.742952000  |
| H | -0.518229000  | -1.102903000 | -5.890994000  |
| H | -5.656358000  | 2.412551000  | -1.607599000  |
| H | -5.510068000  | 0.713141000  | -2.064462000  |
| H | -2.606853000  | 0.203762000  | -6.350747000  |
| H | -1.669948000  | 1.437102000  | -7.197645000  |
| H | -0.998797000  | -0.197879000 | -8.940795000  |
| H | -1.822909000  | -1.503867000 | -8.091694000  |
| H | -7.135103000  | 0.184631000  | -0.094467000  |

|   |               |              |               |
|---|---------------|--------------|---------------|
| H | -7.377899000  | 1.919981000  | 0.051970000   |
| H | -3.264023000  | 1.029603000  | -9.101022000  |
| H | -3.087295000  | -0.458719000 | -10.086000000 |
| H | -9.190574000  | 1.237232000  | -1.325633000  |
| H | -8.020634000  | 1.890868000  | -2.511882000  |
| H | -8.589212000  | 1.977934000  | -11.032935000 |
| H | -10.276647000 | 0.602197000  | -7.681736000  |
| H | -9.857436000  | -2.881038000 | -6.917318000  |
| H | -11.430086000 | -2.341151000 | -6.298552000  |
| H | -10.855054000 | -1.748383000 | -7.877248000  |
| H | -9.055693000  | -0.063211000 | -12.270884000 |
| H | -7.595103000  | -1.062372000 | -12.513156000 |
| H | -8.799642000  | -1.543237000 | -11.306452000 |
| H | -9.374085000  | 2.810217000  | -7.421810000  |
| H | -8.031628000  | 3.868772000  | -9.666728000  |
| H | -7.291993000  | 3.219160000  | -5.410589000  |
| H | -8.721107000  | 4.231613000  | -5.152063000  |
| H | -7.128495000  | 5.489324000  | -6.436545000  |
| H | -8.514076000  | 5.171927000  | -7.469133000  |
| H | -6.155459000  | 4.976773000  | -8.507412000  |
| H | -5.936661000  | 3.477156000  | -7.582713000  |
| H | 3.916359000   | -6.380168000 | -1.963533000  |
| H | 4.901641000   | -6.838314000 | -4.025495000  |
| H | 3.788320000   | -6.881017000 | -5.412112000  |
| H | 4.870784000   | -5.490086000 | -5.187288000  |
| H | 1.925177000   | -3.574537000 | -6.109653000  |
| H | 3.082146000   | -4.899313000 | -6.342777000  |
| H | 0.378754000   | -3.750210000 | -0.507723000  |
| H | -0.050148000  | -2.711609000 | -1.903288000  |
| H | 1.207280000   | -6.568023000 | -6.140142000  |
| H | 0.086838000   | -5.249875000 | -5.760615000  |
| H | -1.246500000  | -4.711416000 | -2.927439000  |
| H | -0.994477000  | -5.599083000 | -1.413063000  |
| H | 0.641863000   | -4.268042000 | -8.099490000  |
| H | 1.418365000   | -5.813872000 | -8.463107000  |
| H | -2.421223000  | -3.972398000 | -0.190574000  |
| H | -2.503012000  | -2.924928000 | -1.613969000  |
| H | -0.789631000  | -6.968966000 | -7.788645000  |
| H | -1.504937000  | -5.362856000 | -7.622977000  |
| H | -3.650191000  | -4.745974000 | -2.901752000  |
| H | -3.577795000  | -5.808758000 | -1.494172000  |
| H | -5.052390000  | -4.282942000 | -0.204751000  |
| H | -5.081510000  | -3.123709000 | -1.531946000  |
| H | -0.847266000  | -4.958041000 | -10.111140000 |
| H | -0.416986000  | -6.661349000 | -10.183722000 |
| H | -6.061426000  | -6.035025000 | -1.808223000  |
| H | -7.132698000  | -4.680022000 | -1.326054000  |
| H | -2.643982000  | -6.635265000 | -11.010631000 |
| H | -2.862453000  | -7.158284000 | -9.312901000  |
| H | -10.092285000 | -8.551941000 | -4.999107000  |
| H | -8.573708000  | -7.215911000 | -8.431936000  |
| H | -8.623182000  | -3.667544000 | -8.958389000  |
| H | -8.787258000  | -4.479100000 | -10.527692000 |

|    |               |               |              |
|----|---------------|---------------|--------------|
| H  | -9.632154000  | -5.137163000  | -9.103820000 |
| H  | -11.868280000 | -6.891087000  | -4.959903000 |
| H  | -11.571773000 | -5.604297000  | -3.757162000 |
| H  | -11.327380000 | -5.271533000  | -5.479865000 |
| H  | -7.333186000  | -9.070764000  | -7.553676000 |
| H  | -8.202516000  | -10.028874000 | -5.051746000 |
| H  | -4.505966000  | -8.655980000  | -6.924330000 |
| H  | -4.785533000  | -9.963278000  | -8.084847000 |
| H  | -4.687110000  | -10.916231000 | -5.881381000 |
| H  | -6.328883000  | -11.109965000 | -6.475952000 |
| H  | -6.002157000  | -10.442200000 | -4.000224000 |
| H  | -5.517960000  | -8.829037000  | -4.560799000 |
| Ag | -9.000484000  | -3.204805000  | -4.158091000 |
| Ag | -6.005522000  | -2.752358000  | -9.852620000 |

## Enthalpy and entropy of formation for complex isomers $[\text{Ag}_n\text{L}_m]^{n+}$

**Table S1.** Enthalpy (kcal/mol) and entropy (kcal/(mol·K)) of formation for complex isomers  $[\text{Ag}_n\text{L}_m]^{n+}$ .

| Composition<br>(coordination mode)                                       | Figure | $\Delta H_{298}^{\circ}$ | $\Delta S_{298}$      |
|--------------------------------------------------------------------------|--------|--------------------------|-----------------------|
| $\text{Ag}^+ + 2\text{L1}^{\text{a}}$                                    |        |                          |                       |
| $[\text{AgL1}(\text{N3})_2]^+$                                           | 1c     | -9.64                    | -37.73                |
| $[\text{AgL1}(\text{N1})_2]^+$                                           | 1d     | -21.82                   | -43.96                |
| $\text{Ag}^+ + \text{L3}^{\text{a}}$                                     |        |                          |                       |
| $[\text{AgL3}(\text{N3},\text{N3})]^+$                                   | 2b     | -2.64                    | 32.96                 |
| $[\text{AgL3}(\text{N3},\text{N3})]^+$                                   | 2c     | -1.74                    | 31.73                 |
| $[\text{AgL3}(\text{N3},\text{S})]^+$                                    | 2d     | -2.74                    | 24.96                 |
| $[\text{Ag}_2\text{L3}(\text{N1},\text{N1})_2]^{2+}$                     | 2e     | -19.74                   | -5.73                 |
|                                                                          |        | (-9.87) <sup>b</sup>     | (-2.86) <sup>b</sup>  |
| $[\text{Ag}_2\text{L3}(\text{N1},\text{N1})_2]^{2+}$                     | 2f     | -18.92                   | -0.36                 |
|                                                                          |        | (-9.46) <sup>b</sup>     | (-0.18) <sup>b</sup>  |
| $[\text{AgL3}(\text{N1})_2]^+$                                           | 2g     | -17.24                   | -35.95                |
| $[\text{Ag}_2\text{L3}(\text{N1},\text{N1})\text{L3}(\text{N1})_2]^{2+}$ | 2h     | -28.76                   | -73.41                |
|                                                                          |        | (-14.38) <sup>b</sup>    | (-36.70) <sup>b</sup> |
| $\text{Ag}^+ + \text{L4}^{\text{a}}$                                     |        |                          |                       |
| $[\text{AgL4}(\text{N1},\text{N3})]^+$                                   | 3b     | -10.77                   | 28.05                 |
| $[\text{AgL4}(\text{N1},\text{N3})]^+$                                   | 3c     | -11.15                   | 23.21                 |
| $[\text{AgL4}(\text{N3},\text{N3})]^+$                                   | 3d     | -4.84                    | 21.43                 |
| $[\text{AgL4}(\text{N1},\text{N1})]^+$                                   | 3e     | -17.52                   | 16.02                 |
| $\text{Ag}^+ + \text{L5a}^{\text{a}}$                                    |        |                          |                       |
| $[\text{AgL5a}(\text{N3},\text{N3})]^+$                                  | 4b     | 3.79                     | 12.60                 |
| $[\text{AgL5a}(\text{S},\text{S})]^+$                                    | 4c     | 6.68                     | 21.38                 |
| $[\text{AgL5a}(\text{S},\text{N3},\text{S})]^+$                          | 4d     | -4.57                    | 19.23                 |
| $[\text{Ag}_2\text{L5a}(\text{N1},\text{N1})_2]^{2+}$                    | 4e     | -10.08                   | -46.57                |
|                                                                          |        | (-5.04) <sup>b</sup>     | (-23.28) <sup>b</sup> |
| $[\text{Ag}_2\text{L5a}(\text{N1},\text{N1})_2]^{2+}$                    | 4f     | -8.34                    | -44.26                |
|                                                                          |        | (-4.17) <sup>b</sup>     | (-22.13) <sup>b</sup> |

<sup>a</sup> Equimolar mixtures of  $\text{Ag}^+$  ion and ligand L in  $\text{CDCl}_3$ - $\text{DMSO}-d_6 = 1 : 1$  (v/v) at 303 K;

<sup>b</sup> per one  $\text{Ag}^+$  ion
